# Supplementary material
Source: Research Square preprint supplement (doi:10.21203/rs.3.rs-9581391/v1)
Supplement: Supplementary file 1 [file 042368c9cf6c45f6ffdc298b.docx]

**ADDITIONAL FILE 2**

**Pre-simulation and Post-simulation questionnaires**

Gerard S. Angeles-Fite1,2,3,4,*, Sara García-Ballester5, Federico Migliorelli6,7, Lidia Gómez-López4,8, Beatriz Tena2,4,8, Marina Vendrell2,4,8, Manuel López‐Baamonde4,7,8, Juan M. Perdomo2,4,8, Cristina Ibañez4,8, Raquel Bergé4,8, Tomás Cuñat4,8, Johannes Schäfer1,3, Albert Carramiñana4,8, Miriam F. Panzeri4,8, Ricard Valero2,7,8,9,† and Christopher Neuhaus1,3,†

1Medical Faculty Heidelberg, Department of Anesthesiology, Heidelberg University, Heidelberg, Germany.

2Departament de Cirurgia i Especialitats Medicoquirúrgiques, Facultat de Medicina i Ciències de la Salut, Universitat de Barcelona (UB), Barcelona, Spain.

3Heidelberg Anaesthesia and Emergency Simulation Centre (HANS), Heidelberg University Hospital, Heidelberg, Germany.

4Anaesthesiology Clinical Simulation Group (SIMCLÍNIC), *Hospital Clínic de Barcelona*, Barcelona, Spain.

5Department of Anaesthesiology and Critical Care, Bellvitge University Hospital, University of Barcelona, Hospitalet de Llobregat, Barcelona, Spain.

6BCNatal - Barcelona Center for Maternal-Fetal and Neonatal Medicine (*Hospital Clínic* *and Hospital Sant Joan de Déu*), *Institut Clínic de Ginecologia, Obstetrícia i Neonatologia*, Fetal i+D Fetal Medicine Research Center, Barcelona, Spain.

7Institut d’Investigacions Biomèdiques August Pi i Sunyer (IDIBAPS), Barcelona, Spain.

8Department of Anaesthesiology and Critical Care, *Hospital Clínic de Barcelona*, Barcelona, Spain.

9*Centro de Investigación Biomédica en Red de Salud Mental* (CIBERSAM), *Instituto de Salud Carlos III* (ISCIII), Spain

*Correspondence to: Gerard Sergi Angeles Fite, Department of Anaesthesiology and Intensive Care, Bürgerspital Solothurn, Schöngrünstrasse 42, 4500 Solothurn, Switzerland; Tel: +41326274041; E-mail: gerardsergi.angeles@gmail.com

†Contributed equally to this work

**Table of contents**

[PRESIMULATION QUESTIONNAIRE 3](#_Toc227448849)

[POST-SIMULATION QUESTIONNAIRE 1 8](#_Toc227448850)

[POST-SIMULATION QUESTIONNAIRE 2 9](#_Toc227448851)

Identification number: Date:

## PRESIMULATION QUESTIONNAIRE

**A) Demographic data**

1. How old are you*?* ___

2. Please indicate your gender: Male Female Diverse

3. Which year of specialist training are you currently in? Year 1 (< 12 months) Year 2 (12–24 months) Year 3 (24–36 months) Year 4 (36–48 months) Year 5 (48–60 months)

4. Please indicate the country in which you completed your medical degree: _________________

**B) Professional preferences**

1. Was anaesthesiology your first-choice specialty when selecting your postgraduate training? Yes No

2. Did you begin another specialty training programme before your current one? Yes No

3. What are your main areas of interest within anaesthesiology? *(Please select up to three options)*:

No preference Anaesthesia for general surgery Anaesthesia for trauma and orthopaedics Anaesthesia for urology Paediatric anaesthesia Anaesthesia for obstetrics and gynaecology Anaesthesia for cardiac, thoracic or vascular surgery Regional anaesthesia Intensive care medicine Emergency medicine Pain medicine Palliative care Other: ____

**C) Structure of specialist training in anaesthesiology**

C1) Theoretical training / teaching sessions

1. Does your department offer regular and structured teaching activities (e.g. lectures or seminars) in anaesthesiology? Yes No

2. If yes: On average, how many hours per week are spent on such activities? <1 1–2 2–3 3–4 >4 hours/week

3. If yes: Do these activities take place during your regular working hours?

Yes, entirely Yes, partially No

4. If yes: Are you satisfied with the quality and relevance of these activities? Yes No

C2) Supervision and support in the operating theatre

1. What proportion of your work in the operating theatre is performed under direct supervision by a consultant or senior physician? Never < 25% 25–50% 50–75% > 75% Always

2. Is the supervising consultant or senior physician responsible for other trainees at the same time? If yes, how many? None (only me) 1 2–3 3–4 4–5 >5

C3) Rotations

1. If you complete your training as planned, how many months will you have spent in the following areas? Anaesthesiology: _____ months Intensive care medicine: _____ months Emergency medicine: _____ months Pain medicine: _____ months

C4) Individual guidance /mentoring during specialist training

1. Do you receive structured mentoring or individual career guidance during your training? Yes No

2. If yes: Are regular meetings held as part of this mentoring? Yes No

3. If yes: How often do this meetings typically take place? <1 1 2 3 >3 per year

4. If yes: Are you satisfied with the mentoring provided? Yes No

5. If no: Would you like to have structured mentoring as part of your training? Yes No

**D) Working conditions during specialist training**

1. According to your contract, how many hours per week are you required to work? <20 20-30 30-40 40-50 50-60 >60 hours/week

2. Do you regularly work more hours than contractually agreed (including overtime)? Yes No

3. If yes: How many additional hours per week do you work on average? < +2 +2-5 +5-10 +10-20 > +20 hours/week

4. Do you regularly work 24-hour shifts? Yes No

5. Do you regularly work night-shifts (<24 hours)? Yes No

6. How many 24-hour shifts do you work on average per month? 1 2-3 4-5 6-7 ≥8

7. How many night shifts (<24 hours) do you work on average per month? 1 2-3 4-5 6-7 ≥8

**E) Prior experience outside of anaesthesia for surgical procedures**

1. Have you worked in intensive care or intermediate care (IMC)? Yes, completed rotation Yes, currently rotating No

2. Have you worked in prehospital emergency care? *(multiple answers possible)* Yes, as a paramedic Yes, as an emergency physician Yes, currently in training as an emergency physician No

3. Have you worked in an emergency department (also outside your current training)? Yes No

4. Have you ever worked as a qualified nurse? Yes No

**F) Simulation training**

1. Have you participated in simulation-based training organised by your own department? Never 1 2-4 5-7 8-10 >10 times

2. Have you participated in simulation-based training organised externally? Never 1 2-4 5-7 8-10 >10 times

**G) Additional learning resources and self-study**

1. Do you regularly (>2 per year) attend external lectures or seminars in anaesthesiology? Yes No

2. Do you regularly use online learning resources (e.g. websites, blogs, courses)? Yes No

3. How many hours of your free time do you regularly dedicate to self-study in anaesthesiology?

<1 1-2 2-3 3-4 >4 hours/week

**H) Interpersonal relationships in the workplace**

Please indicate your level of agreement using the following scale: 1 = strongly disagree; 2 = disagree; 3 = neutral; 4 = agree; 5 = strongly agree.

|  | strongly disagree | *disagree* | *neutral* | *agree* | strongly agree |
| --- | --- | --- | --- | --- | --- |
| I am very satisfied with my relationship with other anaesthesiology trainees. | 1 | 2 | 3 | 4 | 5 |
| I am very satisfied with my relationship with my supervisors (e.g. consultants). | 1 | 2 | 3 | 4 | 5 |
| I am very satisfied with my relationship with physicians from other departments. | 1 | 2 | 3 | 4 | 5 |
| I am very satisfied with my current working conditions. | 1 | 2 | 3 | 4 | 5 |
| The level of responsibility I carry matches my current level of competence. | 1 | 2 | 3 | 4 | 5 |

Identification number: Date:

## POST-SIMULATION QUESTIONNAIRE 1

**A) Assessment of simulation quality – Scenario 1: „Unexpected difficult airway“**

|  | strongly disagree | disagree | neutral | agree | strongly agree |
| --- | --- | --- | --- | --- | --- |
| The room used was appropriate to realistically represent the simulated scenario. | 1 | 2 | 3 | 4 | 5 |
| The equipment available in the room was appropriate to realistically represent the simulated scenario. | 1 | 2 | 3 | 4 | 5 |
| The simulation manikin used in the scenario was appropriate to represent a real patient. | 1 | 2 | 3 | 4 | 5 |
| The monitors displaying vital signs were arranged similarly to real clinical situations in my workplace. | 1 | 2 | 3 | 4 | 5 |
| The performance of the confederates was realistic and consistent with their roles in clinical practice. | 1 | 2 | 3 | 4 | 5 |
| The progression of the scenario clearly reflected the patient’s clinical deterioration. | 1 | 2 | 3 | 4 | 5 |
| Overall, the situation was sufficiently realistic for me to engage with the scenario. | 1 | 2 | 3 | 4 | 5 |

Please indicate your level of agreement using the following scale: 1 = strongly disagree; 2 = disagree; 3 = neutral; 4 = agree; 5 = strongly agree.

**B) Training and prior experience related to “Unexpected difficult airway”**

1. Before this simulation, had you attended a lecture or seminar on the topic of “unexpected difficult airway”? Yes No

2. Before this simulation, had you participated in a simulation-based training on the topic of “unexpected difficult airway”? Yes No

3. In your previous clinical practice, have you encountered an “unexpected difficult airway”? Yes No

Identification number: Date:

## POST-SIMULATION QUESTIONNAIRE 2

**A) Assessment of simulation quality – Scenario 2: “Local anaesthetic systemic toxicity”**

|  | strongly disagree | disagree | neutral | agree | strongly agree |
| --- | --- | --- | --- | --- | --- |
| The room used was appropriate to realistically represent the simulated scenario. | 1 | 2 | 3 | 4 | 5 |
| The equipment available in the room was appropriate to realistically represent the simulated scenario. | 1 | 2 | 3 | 4 | 5 |
| The simulation manikin used in the scenario was appropriate to represent a real patient. | 1 | 2 | 3 | 4 | 5 |
| The monitors displaying vital signs were arranged similarly to real clinical situations in my workplace. | 1 | 2 | 3 | 4 | 5 |
| The performance of the confederates was realistic and consistent with their roles in clinical practice. | 1 | 2 | 3 | 4 | 5 |
| The progression of the scenario clearly reflected the patient’s clinical deterioration. | 1 | 2 | 3 | 4 | 5 |
| Overall, the situation was sufficiently realistic for me to engage with the scenario. | 1 | 2 | 3 | 4 | 5 |

Please indicate your level of agreement using the following scale: 1 = strongly disagree; 2 = disagree; 3 = neutral; 4 = agree; 5 = strongly agree.

**B) Training and prior experience related to “Local anaesthetic systemic toxicity”**

1. Before this simulation, had you attended a lecture or seminar on the topic of “local anaesthetic systemic toxicity”? Yes No

2. Before this simulation, had you participated in simulation-based training on the topic of “local anaesthetic systemic toxicity”? Yes No

3. In your previous clinical practice, have you encountered a case of “local anaesthetic systemic toxicity”? Yes No
