# Supplementary material
Source: Research Square preprint supplement (doi:10.21203/rs.3.rs-9581391/v1)
Supplement: Supplementary file 2 [file 0eb5a466a3b9b7d171888609.docx]

**ADDITIONAL FILE 1**

**Reporting checklists**

Gerard S. Angeles-Fite1,2,3,4,*, Sara García-Ballester5, Federico Migliorelli6,7, Lidia Gómez-López4,8, Beatriz Tena2,4,8, Marina Vendrell2,4,8, Manuel López‐Baamonde4,7,8, Juan M. Perdomo2,4,8, Cristina Ibañez4,8, Raquel Bergé4,8, Tomás Cuñat4,8, Johannes Schäfer1,3, Albert Carramiñana4,8, Miriam F. Panzeri4,8, Ricard Valero2,7,8,9,† and Christopher Neuhaus1,3,†

1Medical Faculty Heidelberg, Department of Anesthesiology, Heidelberg University, Heidelberg, Germany.

2Departament de Cirurgia i Especialitats Medicoquirúrgiques, Facultat de Medicina i Ciències de la Salut, Universitat de Barcelona (UB), Barcelona, Spain.

3Heidelberg Anaesthesia and Emergency Simulation Centre (HANS), Heidelberg University Hospital, Heidelberg, Germany.

4Anaesthesiology Clinical Simulation Group (SIMCLÍNIC), *Hospital Clínic de Barcelona*, Barcelona, Spain.

5Department of Anaesthesiology and Critical Care, Bellvitge University Hospital, University of Barcelona, Hospitalet de Llobregat, Barcelona, Spain.

6BCNatal - Barcelona Center for Maternal-Fetal and Neonatal Medicine (*Hospital Clínic* *and Hospital Sant Joan de Déu*), *Institut Clínic de Ginecologia, Obstetrícia i Neonatologia*, Fetal i+D Fetal Medicine Research Center, Barcelona, Spain.

7Institut d’Investigacions Biomèdiques August Pi i Sunyer (IDIBAPS), Barcelona, Spain.

8Department of Anaesthesiology and Critical Care, *Hospital Clínic de Barcelona*, Barcelona, Spain.

9*Centro de Investigación Biomédica en Red de Salud Mental* (CIBERSAM), *Instituto de Salud Carlos III* (ISCIII), Spain

*Correspondence to: Gerard Sergi Angeles Fite, Department of Anaesthesiology and Intensive Care, Bürgerspital Solothurn, Schöngrünstrasse 42, 4500 Solothurn, Switzerland; Tel: +41326274041; E-mail: gerardsergi.angeles@gmail.com

†Contributed equally to this work

**Table of contents**

[STrengthening the Reporting of OBservational studies in Epidemiology (STROBE) checklist 3](#_Toc227448522)

[Simulation-Based Research Extensions for the STROBE Statement 14](#_Toc227448523)

## STrengthening the Reporting of OBservational studies in Epidemiology (STROBE) checklist

|  | Item No. | Recommendation | Page  No. | Relevant text from manuscript |
| --- | --- | --- | --- | --- |
| **Title and abstract** | 1 | (*a*) Indicate the study’s design with a commonly used term in the title or the abstract | 1 | *An observational pilot study* |
| (*b*) Provide in the abstract an informative and balanced summary of what was done and what was found | 2–3 | **Methods** This prospective observational pilot study was conducted between May 2022 and March 2023 at two university hospital simulation centres in Germany and Spain. Third- and fourth-year anaesthesiology trainees completed a pre-simulation questionnaire, a 20-item multiple-choice knowledge test, and two standardised high-fidelity perioperative anaesthesia scenarios. Technical skills were assessed using the novel *Structured Assessment of Clinical Skills in Simulation* (SACSS), and non-technical skills using the *Anaesthetists’ Non-Technical Skills* (ANTS) system. Performances were video-recorded and independently rated by two evaluators. Quantitative variables were compared using the Mann-Whitney *U* test and categorical variables using the chi-square or Fisher’s exact test. Effect size (*r*) was calculated.  **Results** Out of 67 invited trainees, 43 participated, and complete data were available for 42. Significant differences were identified between training systems. German training was characterised by greater clinical autonomy, less direct supervision, more prehospital emergency medicine experience, and longer rotations and working hours. Spanish training involved more frequent structured teaching, greater exposure to simulation, closer supervision, and mandatory pain medicine rotations. Despite these differences, no statistically significant between-group differences were observed in knowledge test scores or in technical and non-technical skills across both scenarios. Simulation quality was rated highly in both groups.  **Conclusions** Despite marked structural differences between two centres representing the German and Spanish postgraduate anaesthesiology training programmes, no statistically significant between-group differences were detected in overall European Training Requirement-defined competencies among advanced trainees. Given the small sample and single-centre sampling per country, these findings should be interpreted as hypothesis-generating rather than as evidence of equivalence. These results support the feasibility of simulation-based multimodal assessment for cross-national comparison of competence in European postgraduate medical education. |
| Introduction |
| Background/ rationale | 2 | Explain the scientific background and rationale for the investigation being reported | 3–4 | **Background**  Despite ongoing efforts to harmonise postgraduate training in anaesthesiology across the European Union (EU) [1–3], substantial differences between European training programmes have been reported [1, 4–7], and a unified certification process remains lacking [1, 4, 6, 8].  In the last decades, simulation-based education has become increasingly integrated into anaesthesiology training worldwide [9–11] and within the EU [12–15]. Large-scale initiatives have contributed to the development of simulation-based competence assessment [16–21] and simulation is now used not only for formative but also for summative assessment purposes [16, 18, 22–25]. However, the use of simulation-based assessment in comparative studies evaluating trainees from different training systems remain scarce. Existing research has primarily focused on other medical specialties, or on regions outside Europe, such as the United States and Japan [26, 27].  In the present study, we aimed to compare the competence of advanced anaesthesiology trainees from two European postgraduate training programmes, Germany and Spain, using a multidimensional assessment approach that integrates knowledge testing with simulation-based evaluation of technical and non-technical skills aligned with the European Training Requirements in Anaesthesiology (ETR) [3]. The validity and reliability of this simulation-based assessment model were demonstrated in a previous study [28]. |
| Objectives | 3 | State specific objectives, including any prespecified hypotheses | 4  4 | In the present study, we aimed to compare the competence of advanced anaesthesiology trainees from two European postgraduate training programmes, Germany and Spain, using a multidimensional assessment approach that integrates knowledge testing with simulation-based evaluation of technical and non-technical skills aligned with the European Training Requirements in Anaesthesiology (ETR) [3]. […]  **Aim of the study**  The primary aim of this study was to compare the competence of advanced anaesthesiology trainees from two European postgraduate training programmes, Germany and Spain, using a multimodal assessment model combining knowledge testing with simulation-based evaluation of technical and non-technical skills. A secondary aim was to compare structural characteristics of the two training programmes. |
| Methods |  |
| Study design | 4 | Present key elements of study design early in the paper | 4 | **Study design and setting**  This prospective observational pilot study […] |
| Setting | 5 | Describe the setting, locations, and relevant dates, including periods of recruitment, exposure, follow-up, and data collection | 4–5 | **Study design and setting**  […]was conducted between May 2022 and March 2023 at two university hospital simulation centres: the Heidelberg Anaesthesia and Emergency Simulation Centre (HANS) at Heidelberg University Hospital, Germany, and the Skills Laboratory of the Faculty of Medicine and Health Sciences at the University of Barcelona (UB), Spain, led by the Anaesthesiology Clinical Simulation Group (SIMCLÍNIC) of the Department of Anaesthesiology and Critical Care at *Hospital Clínic de Barcelona*, Spain.The study is reported in accordance with the STrengthening the Reporting of OBservational studies in Epidemiology (STROBE) guidelines [29] and extensions for simulation-based research [30] (Additional file 1). |
| Participants | 6 | (*a*) *Cohort study*—Give the eligibility criteria, and the sources and methods of selection of participants. Describe methods of follow-up  *Case-control study*—Give the eligibility criteria, and the sources and methods of case ascertainment and control selection. Give the rationale for the choice of cases and controls  *Cross-sectional study*—Give the eligibility criteria, and the sources and methods of selection of participants | 5 | **Participants and sample size**  This pilot study used a purposive sampling to meet the study objectives. The sample size was predetermined at 40 trainees because of logistical and financial constraints. To assess competence among advanced anaesthesiology trainees while ensuring feasible recruitment across the two participating centres, and to account for differences in training duration between Spain (four years) and Germany (five years) [6], third- and fourth-year anaesthesiology trainees were recruited at both centres. |
| (*b*)*Cohort study*—For matched studies, give matching criteria and number of exposed and unexposed  *Case-control study*—For matched studies, give matching criteria and the number of controls per case | - | N/A |
| Variables | 7 | Clearly define all outcomes, exposures, predictors, potential confounders, and effect modifiers. Give diagnostic criteria, if applicable | 5 | **Overview of study procedures**  After providing informed consent, participants completed a pre-simulation questionnaire collecting demographic information and details of their postgraduate training. This was followed by a multiple-choice knowledge test and participation in two simulated perioperative anaesthesia scenarios. All simulation performances were video-recorded and independently assessed by two trained evaluators. At the end of the simulation sessions, participants provided additional information and graded the quality of the simulation experience using post-simulation questionnaires. |
| Data sources/ measurement | 8* | For each variable of interest, give sources of data and details of methods of assessment (measurement). Describe comparability of assessment methods if there is more than one group | 5  5  8  9  9 | All simulation performances were video-recorded and independently assessed by two trained evaluators. At the end of the simulation sessions, participants provided additional information and graded the quality of the simulation experience using post-simulation questionnaires.  […]  **Questionnaire design and content**  To collect demographic data and explore structural differences between postgraduate anaesthesiology training in Germany and Spain, one pre-simulation questionnaire and two scenario-specific post-simulation questionnaires were developed.  […]  Audio and video recording systems enabled documentation of participants’ performance and subsequent analysis.  […]  **Assessment of technical skills: Structured Assessment of Clinical Skills in Simulation**  […] technical skills were assessed using a scenario-specific instrument, the *Structured Assessment of Clinical Skills in Simulation* (SACSS) (see Additional file 5).  […]  **Assessment of non-technical skills**  To compare non-technical skills between groups, the widely used and well validated *Anaesthetists’ Non-Technical Skills* (ANTS) system was used [32, 33]. |
| Bias | 9 | Describe any efforts to address potential sources of bias | 5  6  7  7  8  8  9 | To assess competence among advanced anaesthesiology trainees while ensuring feasible recruitment across the two participating centres, and to account for differences in training duration between Spain (four years) and Germany (five years) [6], third- and fourth-year anaesthesiology trainees were recruited at both centres.  […]  Clinical experience considered potentially relevant to competence acquisition (such as experience in intensive care, prehospital emergency care, and nursing), was recorded in the domain on previous experience outside operative anaesthesia. The simulation training domain documented previous participation in simulation-based training, which might be associated with improved performance in simulation-based competence assessments. The domain on additional learning resources and self-study captured further educational activities that might correlate with better performance in the knowledge test. Finally, the domain on interpersonal relationships in the workplace enabled an indirect assessment of workplace climate, with the aim of identifying possible associations between social factors and the development of professional competence.  […]  The second section collected information on previous training or clinical experience related to the topic of the respective scenario, which might potentially be associated with improved performance. These data were collected only after completion of the scenario to avoid providing cues about its thematic content. All questionnaires were developed in parallel in German and Spanish, to ensure linguistic and conceptual equivalence, and were reviewed and approved by the study team at both sites.  […]  **Simulation scenarios, facilities, and standardisation**  All participants completed the same two 15-minute high-fidelity perioperative simulation scenarios  […]  Detailed scripts for each scenario were available in the local language of each simulation centre. Patients’ vital signs were predetermined and specified on a timeline to ensure standardised progression of each scenario for all participants (see Additional file 4). The two simulation centres had comparable facilities.  […]  All participants were asked to verbalise their thought processes and clinical reasoning while performing in the simulation to support observation of both technical and non- technical skills. They were also encouraged to ask questions if they identified inconsistencies or missing clinical information arising from the inherent limitations of the simulator or mannequin.  […]  Two trained bilingual board-certified anaesthesiologists and experienced simulation educators independently rated all video recordings. Raters were blinded to each other’s assessments and reviewed the recordings in the same randomly generated order using a standard media player. |
| Study size | 10 | Explain how the study size was arrived at | 5 | The sample size was predetermined at 40 trainees because of logistical and financial constraints. |

| Quantitative variables | 11 | Explain how quantitative variables were handled in the analyses. If applicable, describe which groupings were chosen and why | 7  8  9  9  9  9 | **Knowledge test**  The test was scored according to the official EDAIC scoring system, with one point awarded for each correct response and no penalty for incorrect answers (see <https://www.esaic.org/education/edaic/part-i-examination>), yielding a final score ranging from 0 to 100. The knowledge test is provided as Additional file 3.  […]  **Assessment of technical skills: Structured Assessment of Clinical Skills in Simulation**  For each scenario, the SACSS comprised a scenario-specific checklist (SACSS-checklist) containing 45 items, with final scores reported as percentages, and a 10-domain global rating scale (SACSS-GRS), scored on a five-point Likert scale. The final SACSS-GRS score was calculated as the mean across all domains and expressed as a percentage.  […]  **Assessment of non-technical skills**  To compare non-technical skills between groups, the widely used and well validated *Anaesthetists’ Non-Technical Skills* (ANTS) system was used [32, 33].  […]  Checklist items were scored in real time, whereas SACSS-GRS and ANTS scores were assigned at the end of each video review.  […]  Test results and questionnaires were collected using paper forms. Simulation performances were video-recorded on the computers of the respective simulation facilities. All individual data were managed in pseudonymised form. |
| --- | --- | --- | --- | --- |
| Statistical methods | 12 | (*a*) Describe all statistical methods, including those used to control for confounding | 9–10 | **Data collection and statistical methods**  Descriptive data were summarised as median (interquartile range [IQR]) for quantitative variables and as *n* (%) for categorical variables. Between-group comparisons of quantitative questionnaire data were performed using the Mann-Whitney *U* test. Categorical variables were compared using the chi-square test (χ2) when the expected cell frequency was at least 1 in all cells and fewer than 20% of cells had an expected frequency below 5; otherwise Fisher’s exact test was used. Knowledge test scores and SACSS and ANTS scores were also compared between trainees in Germany and Spain using the Mann-Whitney *U* test. For SACSS and ANTS, the mean of the two raters’ scores was used. A two-sided significance level of 0.05 was applied. Effect size (*r*) was calculated to quantify between-group differences [34]. Missing data were excluded on a variable-by-variable basis. Analyses were performed using SPSS 30.0 (IBM Corp, Armonk, NY, USA). |
| (*b*) Describe any methods used to examine subgroups and interactions | - | N/A |
| (*c*) Explain how missing data were addressed | 10 | Missing data were excluded on a variable-by-variable basis. |
| (*d*) *Cohort study*—If applicable, explain how loss to follow-up was addressed  *Case-control study*—If applicable, explain how matching of cases and controls was addressed  *Cross-sectional study*—If applicable, describe analytical methods taking account of sampling strategy | - | N/A |
| (*e*) Describe any sensitivity analyses | - | N/A |
| Results |
| Participants | 13* | (a) Report numbers of individuals at each stage of study—eg numbers potentially eligible, examined for eligibility, confirmed eligible, included in the study, completing follow-up, and analysed | 10 | **Participants**  Out of the 67 trainees invited, 43 agreed to participate: 24 in Germany (13 third- and 11 fourth-year trainees) and 19 in Spain (10 third- and 9 fourth-year trainees). Complete data were available for 42 participants. Details of participant flow and data analysis are presented in Figure 1. |
| (b) Give reasons for non-participation at each stage | - | Figure 1 |
| (c) Consider use of a flow diagram | - | Figure 1 |
| Descriptive data | 14* | (a) Give characteristics of study participants (eg demographic, clinical, social) and information on exposures and potential confounders | 10  – | **Participant characteristics**  No statistically significant differences were observed between groups with respect to age, sex distribution, or year of training. Differences were identified in the country of undergraduate medical education, with a higher proportion of Spanish trainees having completed their medical studies outside the EU. Spanish trainees also reported spending more time on self-directed study and expressed greater interest in certain subspecialties, including cardiac and urological anaesthesia. A detailed summary of participant characteristics is provided in Table 1.  […]  Table 1 |
| (b) Indicate number of participants with missing data for each variable of interest | 18–20 | Tables 3 and 4 |
| (c) *Cohort study*—Summarise follow-up time (eg, average and total amount) | - | N/A |
| Outcome data | 15* | *Cohort study*—Report numbers of outcome events or summary measures over time | *-* | N/A |
| *Case-control study—*Report numbers in each exposure category, or summary measures of exposure | *-* | N/A |
| *Cross-sectional study—*Report numbers of outcome events or summary measures | *-* | N/A |
| Main results | 16 | (*a*) Give unadjusted estimates and, if applicable, confounder-adjusted estimates and their precision (eg, 95% confidence interval). Make clear which confounders were adjusted for and why they were included | - | N/A |
| (*b*) Report category boundaries when continuous variables were categorized | - | N/A |
| (*c*) If relevant, consider translating estimates of relative risk into absolute risk for a meaningful time period | - | N/A |

| Other analyses | 17 | Report other analyses done—eg analyses of subgroups and interactions, and sensitivity analyses | - | N/A |
| --- | --- | --- | --- | --- |
| **Discussion** |
| Key results | 18 | Summarise key results with reference to study objectives | 15  15  15  16 | This study demonstrates the feasibility of using a standardised, simulation-based multimodal assessment to compare anaesthesiology trainees across different European training programmes. Two scenarios were successfully implemented in two simulation centres across two different countries and languages. The use of a multidimensional assessment approach enabled a comprehensive evaluation of anaesthesiology competence, encompassing theoretical knowledge as well as technical and non-technical skills in realistic simulated settings.  […]  Substantial differences were identified in the structure and organisation of the training programmes at the two centres. Training in Germany was characterised by greater clinical autonomy, lower levels of direct one-to-one supervision, more frequent prehospital emergency medicine experience, and longer rotations and working hours within an overall longer training programme. In contrast, the Spanish programme included more structured theoretical teaching, more frequent direct supervision, mandatory rotations in pain medicine, and greater exposure to simulation training, together with shorter working hours and shorter rotations in intensive care and emergency medicine.  […]  Despite these structural disparities, no statistically significant differences in overall competence were observed between German and Spanish trainees across the domains of knowledge, technical, and non-technical skills, either in the full sample or when stratified by year of training (Tables 3 and 4).  […]  Nevertheless, the observed effect sizes for the knowledge test, and for the SACSS-checklist and ANTS in Scenario 2 (*r*=0.168, *r*=0.206 and *r*=0.157 respectively; Table 3), suggest small but potentially educationally meaningful differences that may not have reached statistical significance because of the limited sample size. The absence of statistically significant differences should therefore be interpreted cautiously, as consistent with, rather than demonstrative of, cross-system equivalence. It remains possible that a larger sample would have yielded different findings. |
| Limitations | 19 | Discuss limitations of the study, taking into account sources of potential bias or imprecision. Discuss both direction and magnitude of any potential bias | 17–18 | Several limitations should be considered. As a pilot study conducted without a formal sample size calculation or power analysis, this study was likely underpowered to detect small-to-moderate differences between groups. In addition, purposive sampling and voluntary participation may have introduced selection bias. Clinical experience was not quantified in months; therefore, variation within training years was not captured and may have influenced performance outcomes. Differences in prior exposure to simulation training between groups may also have affected performance in this simulation-based assessment, potentially favouring participants who were more familiar with the simulation environment.  Each country was represented by a single well-resourced academic centre (Heidelberg University Hospital; *Hospital Clínic de Barcelona*), which is unlikely to be fully representative of national training. Observations characterising "German" or "Spanish" training should therefore be interpreted as describing the two participating centres. The sites also used different high-fidelity mannequins (Human Patient Simulator®, METI®, in Heidelberg; SimMan®, Laerdal, in Barcelona), which differ in airway anatomy, physiological response, and tactile feedback—features directly relevant to several SACSS-checklist items, particularly airway management in Scenario 1. Despite pilot testing, residual platform-specific effects on item-level performance cannot be excluded, and the use of different confederates across sites may have introduced further variability.  The 20-item knowledge test was drawn from publicly available EDAIC Part I sample questions. Although this enhanced standardisation, it also raises the possibility of differential prior exposure: Spanish trainees reported significantly more self-directed study and may therefore have been more familiar with EDAIC preparation materials, potentially contributing to their trend towards higher scores. Participants were not asked whether they had previously encountered the specific items used.  Finally, the limited number of scenarios and knowledge test items restricted the breadth of assessment and may have further limited generalisability. Although the SACSS-checklist and SACSS-GRS were carefully developed and internally validated [28], external validation is still pending. All assessment tools used, including SACSS and ANTS, are susceptible to rater bias; differences in rater training, the absence of formal calibration, and the involvement of one rater in tool development may have affected inter-rater reliability. Video-based assessment with repeated viewing may also limit transferability to real-time contexts. Moreover, simulation cannot fully reproduce clinical practice, and performance in simulated settings may not directly reflect real-world clinical performance. |
| Interpretation | 20 | Give a cautious overall interpretation of results considering objectives, limitations, multiplicity of analyses, results from similar studies, and other relevant evidence | 18 | Despite these limitations, this study provides a practical example of the application of a multimodal assessment model aligned with European competency frameworks in a multilingual context and supports the further development of multicentre, multilingual simulation-based assessments in Europe. Larger multicentre studies, ideally conducted in collaboration with European anaesthesiology organisations, are needed to further develop, validate, and implement this methodology. In addition, this study illustrates the potential of standardised simulation scenarios and corresponding assessment instruments to identify structural differences between training programmes. Further international research is needed to examine these differences on a broader scale and to explore their impact on postgraduate trainees. A better understanding of how different training models influence competency development may help optimise training systems, particularly in the context of the ongoing transition towards competency-based medical education. |
| Generalisability | 21 | Discuss the generalisability (external validity) of the study results | 16  17  18  18  18 | The absence of statistically significant differences should therefore be interpreted cautiously, as consistent with, rather than demonstrative of, cross-system equivalence. It remains possible that a larger sample would have yielded different findings.  […]  Further research is therefore needed to clarify these relationships.  […]  Although the SACSS-checklist and SACSS-GRS were carefully developed and internally validated [28], external validation is still pending.  […]  Larger multicentre studies, ideally conducted in collaboration with European anaesthesiology organisations, are needed to further develop, validate, and implement this methodology.  […]  Further international research is needed to examine these differences on a broader scale and to explore their impact on postgraduate trainees. |
| Other information |  |
| Funding | 22 | Give the source of funding and the role of the funders for the present study and, if applicable, for the original study on which the present article is based | 25 | **Funding**  This work was supported by the Department of Anaesthesiology, Heidelberg University (Germany); the Department of Anaesthesiology and Critical Care, *Hospital Clínic de Barcelona* (Spain); and the Skills Laboratory, Faculty of Medicine and Health Sciences, University of Barcelona (Spain). |

*Give information separately for cases and controls in case-control studies and, if applicable, for exposed and unexposed groups in cohort and cross-sectional studies.

**Note:** An Explanation and Elaboration article discusses each checklist item and gives methodological background and published examples of transparent reporting. The STROBE checklist is best used in conjunction with this article (freely available on the Web sites of PLoS Medicine at http://www.plosmedicine.org/, Annals of Internal Medicine at http://www.annals.org/, and Epidemiology at http://www.epidem.com/). Information on the STROBE Initiative is available at www.strobe-statement.org.

## Simulation-Based Research Extensions for the STROBE Statement

**Simulation-Based Research Extensions for the STROBE Statement**

| **Section/topic** | Item No. | STROBE recommendation | Extension for Simulation-Based Research | Page  No. | Relevant text from manuscript |
| --- | --- | --- | --- | --- | --- |
| **Title and abstract** | 1 | (*a*) Indicate the study’s design with a commonly used term in the title or the abstract  (*b*) Provide in the abstract an informative and balanced summary of what was done and what was found | In abstract or key terms, the MESH or searchable keyword term must have the word simulation or simulated. | 2  2  3  3 | […] using a multimodal assessment model combining knowledge testing with simulation-based evaluation of technical and non-technical skills  […]  This prospective observational pilot study was conducted between May 2022 and March 2023 at two university hospital simulation centres in Germany and Spain.  […]  These results support the feasibility of simulation-based multimodal assessment for cross-national comparison of competence in European postgraduate medical education.  […]  **Keywords**  Anaesthesiology training, European Training Requirements, Germany, Non-technical skills, Postgraduate medical education, Simulation-based assessment, Spain, Technical skills. |
| Introduction |
| Background | 2 | Explain the scientific background and rationale for the investigation being reported | Clarify whether simulation is subject of research or investigational method for research. | 4 | In the present study, we aimed to compare the competence of advanced anaesthesiology trainees from two European postgraduate training programmes, Germany and Spain, using a multidimensional assessment approach that integrates knowledge testing with simulation-based evaluation of technical and non-technical skills aligned with the European Training Requirements in Anaesthesiology (ETR) [3]. The validity and reliability of this simulation-based assessment model were demonstrated in a previous study [28]. |
| Objectives | 3 | State specific objectives, including any prespecified hypotheses |  |  | - |
| Methods |
| Study design | 4 | Present key elements of study design early in the paper |  |  | - |
| Setting | 5 | Describe the setting, locations, and relevant dates, including periods of recruitment, exposure, follow-up, and data collection |  |  | - |
| Participants | 6 | (*a*) *Cohort study*—Give the eligibility criteria, and the sources and methods of selection of participants. Describe methods of follow-up  *Case-control study*—Give the eligibility criteria, and the sources and methods of case ascertainment and control selection. Give the rationale for the choice of cases and controls  *Cross-sectional study*—Give the eligibility criteria, and the sources and methods of selection of participants |  |  | - |
| (*b*)*Cohort study*—For matched studies, give matching criteria and number of exposed and unexposed  *Case-control study*—For matched studies, give matching criteria and the number of controls per case |  |  | - |
| Variables | 7 | Clearly define all outcomes, exposures, predictors, potential confounders, and effect modifiers. Give diagnostic criteria, if applicable | Describe the theoretical and/or conceptual rationale for the design of the intervention/ exposure. Describe the intervention/exposure with sufficient detail to permit replication. Clearly describe all simulation-specific exposures, potential confounders, and effect modifiers. | 5  5  5–9 | **Participants and sample size**  This pilot study used a purposive sampling to meet the study objectives. The sample size was predetermined at 40 trainees because of logistical and financial constraints. To assess competence among advanced anaesthesiology trainees while ensuring feasible recruitment across the two participating centres, and to account for differences in training duration between Spain (four years) and Germany (five years) [6], third- and fourth-year anaesthesiology trainees were recruited at both centres.  […]  **Overview of study procedures**  After providing informed consent, participants completed a pre-simulation questionnaire collecting demographic information and details of their postgraduate training. This was followed by a multiple-choice knowledge test and participation in two simulated perioperative anaesthesia scenarios. All simulation performances were video-recorded and independently assessed by two trained evaluators. At the end of the simulation sessions, participants provided additional information and graded the quality of the simulation experience using post-simulation questionnaires.  […]  **Questionnaire design and content**  To collect demographic data and explore structural differences between postgraduate anaesthesiology training in Germany and Spain, one pre-simulation questionnaire and two scenario-specific post-simulation questionnaires were developed.  The pre-simulation questionnaire was based on a previously published Europe-wide survey of anaesthesiology trainees [31]. It covered eight domains: demographics; specialty preferences; structure of anaesthesiology training; working conditions during specialist training; previous clinical experience outside operative anaesthesia; simulation training; additional learning resources and self-study; and interpersonal relationships at work.  The domain addressing the structure of anaesthesiology training included, among other aspects, items on the availability of structured teaching and educational activities, the practical supervision provided by senior consultants in the workplace, the duration of planned rotations across different clinical areas, and the availability of individual guidance and career development support (mentoring). The domain on working conditions documented contractual arrangements and participants’ practical involvement in on-call and night shifts. Together, these domains were used to support comparative analysis of training structures in Germany and Spain. Recording the extent of consultant supervision also enabled an estimation of participants’ level of autonomy in routine clinical practice.  Clinical experience considered potentially relevant to competence acquisition (such as experience in intensive care, prehospital emergency care, and nursing), was recorded in the domain on previous experience outside operative anaesthesia. The simulation training domain documented previous participation in simulation-based training, which might be associated with improved performance in simulation-based competence assessments. The domain on additional learning resources and self-study captured further educational activities that might correlate with better performance in the knowledge test. Finally, the domain on interpersonal relationships in the workplace enabled an indirect assessment of workplace climate, with the aim of identifying possible associations between social factors and the development of professional competence.  A separate post-simulation questionnaire was developed for each scenario. Each consisted of two sections. The first section assessed the quality of the simulation, including the suitability of the facilities and technical equipment, the realism of the mannequin and monitoring displays, the authenticity of confederates, and an overall evaluation of the simulation experience. The second section collected information on previous training or clinical experience related to the topic of the respective scenario, which might potentially be associated with improved performance. These data were collected only after completion of the scenario to avoid providing cues about its thematic content.  All questionnaires were developed in parallel in German and Spanish, to ensure linguistic and conceptual equivalence, and were reviewed and approved by the study team at both sites. The German and Spanish versions of the pre-simulation and post-simulation questionnaires are available as Additional file 2.  **Knowledge test**  The development of the knowledge test has been described previously [28]. It comprised 20 multiple-choice questions randomly selected from the Part I sample questions of the European Diploma in Anaesthesiology and Intensive Care (EDAIC) examination, available on the official EDAIC website (<https://www.esaic.org/education/edaic/how-to-prepare-for-the-exam/>). The test was scored according to the official EDAIC scoring system, with one point awarded for each correct response and no penalty for incorrect answers (see <https://www.esaic.org/education/edaic/part-i-examination>), yielding a final score ranging from 0 to 100. The knowledge test is provided as Additional file 3.  **Simulation scenarios, facilities, and standardisation**  All participants completed the same two 15-minute high-fidelity perioperative simulation scenarios: “Anaphylaxis with angioedema and unexpected difficult airway” and “Local anaesthetic systemic toxicity with generalised seizure and cardiac arrest”.  The scenarios were specifically developed by expert anaesthesiologists and simulation educators of the study team [28]. Detailed scripts for each scenario were available in the local language of each simulation centre. Patients’ vital signs were predetermined and specified on a timeline to ensure standardised progression of each scenario for all participants (see Additional file 4).  Simulation facilities at both centres were comparable. Each site had a simulated operating theatre of approximately 15 m2, equipped with a standard anaesthesia machine, monitoring system, anaesthesia trolley, operating table, and high-fidelity simulation mannequin. Standard medical equipment and consumables were those routinely used at the respective teaching hospital. Adjacent to the simulation room, and separated by a one-way mirror, an instructor control area allowed operation of the simulator. Audio and video recording systems enabled documentation of participants’ performance and subsequent analysis. Different simulation mannequins were used at the two sites: a Human Patient Simulator® (Medical Education Technologies, Inc.®, Sarasota, FL, USA) in Germany, and a SimMan® (Laerdal Medical, Stavanger, Norway) in Spain.  Two confederates acted as the anaesthesia nurse and surgical nurse throughout each scenario, and a third confederate played the role of an anaesthesia consultant who assisted participants at the conclusion of the scenario. Simulation sessions were conducted in the local language of each centre. Both scenarios were pilot tested in both simulation centres before participant inclusion.  All participants were asked to verbalise their thought processes and clinical reasoning while performing in the simulation to support observation of both technical and non- technical skills. They were also encouraged to ask questions if they identified inconsistencies or missing clinical information arising from the inherent limitations of the simulator or mannequin.  **Assessment of technical skills: Structured Assessment of Clinical Skills in Simulation**  In order to compare trainees’ performance, technical skills were assessed using a scenario-specific instrument, the *Structured Assessment of Clinical Skills in Simulation* (SACSS) (see Additional file 5). For each scenario, the SACSS comprised a scenario-specific checklist (SACSS-checklist) containing 45 items, with final scores reported as percentages, and a 10-domain global rating scale (SACSS-GRS), scored on a five-point Likert scale. The final SACSS-GRS score was calculated as the mean across all domains and expressed as a percentage. The SACSS for each scenario was developed by expert anaesthesiologists and simulation educators to assess competencies derived from the ETR for anaesthesiology (<https://www.uems.eu/european-training-requirements>). The development process and the validity and reliability analyses have been reported previously [28].  **Assessment of non-technical skills**  To compare non-technical skills between groups, the widely used and well validated *Anaesthetists’ Non-Technical Skills* (ANTS) system was used [32, 33].  **Rater training and video-rating process**  Two trained bilingual board-certified anaesthesiologists and experienced simulation educators independently rated all video recordings. Raters were blinded to each other’s assessments and reviewed the recordings in the same randomly generated order using a standard media player. Checklist items were scored in real time, whereas SACSS-GRS and ANTS scores were assigned at the end of each video review. Training in the use of the rating tools has been described previously [28]. |
| Data sources/ measurement | 8 | For each variable of interest, give sources of data and details of methods of assessment (measurement). Describe comparability of assessment methods if there is more than one group | In describing the details of methods of assessment, include (when applicable) the setting, instrument, simulator type, timing in relation to the intervention, along with any methods used to enhance the quality of measurements.  Provide evidence to support the validity and reliability of assessment tools in this context (if available). | 4  4  5  7–9 | The validity and reliability of this simulation-based assessment model were demonstrated in a previous study [28].  […]  **Study design and setting**  This prospective observational pilot study was conducted between May 2022 and March 2023 at two university hospital simulation centres: the Heidelberg Anaesthesia and Emergency Simulation Centre (HANS) at Heidelberg University Hospital, Germany, and the Skills Laboratory of the Faculty of Medicine and Health Sciences at the University of Barcelona (UB), Spain, led by the Anaesthesiology Clinical Simulation Group (SIMCLÍNIC) of the Department of Anaesthesiology and Critical Care at *Hospital Clínic de Barcelona*, Spain.  […]  **Overview of study procedures**  After providing informed consent, participants completed a pre-simulation questionnaire collecting demographic information and details of their postgraduate training. This was followed by a multiple-choice knowledge test and participation in two simulated perioperative anaesthesia scenarios. All simulation performances were video-recorded and independently assessed by two trained evaluators. At the end of the simulation sessions, participants provided additional information and graded the quality of the simulation experience using post-simulation questionnaires.  […]  **Simulation scenarios, facilities, and standardisation**  All participants completed the same two 15-minute high-fidelity perioperative simulation scenarios: “Anaphylaxis with angioedema and unexpected difficult airway” and “Local anaesthetic systemic toxicity with generalised seizure and cardiac arrest”.  The scenarios were specifically developed by expert anaesthesiologists and simulation educators of the study team [28]. Detailed scripts for each scenario were available in the local language of each simulation centre. Patients’ vital signs were predetermined and specified on a timeline to ensure standardised progression of each scenario for all participants (see Additional file 4).  Simulation facilities at both centres were comparable. Each site had a simulated operating theatre of approximately 15 m2, equipped with a standard anaesthesia machine, monitoring system, anaesthesia trolley, operating table, and high-fidelity simulation mannequin. Standard medical equipment and consumables were those routinely used at the respective teaching hospital. Adjacent to the simulation room, and separated by a one-way mirror, an instructor control area allowed operation of the simulator. Audio and video recording systems enabled documentation of participants’ performance and subsequent analysis. Different simulation mannequins were used at the two sites: a Human Patient Simulator® (Medical Education Technologies, Inc.®, Sarasota, FL, USA) in Germany, and a SimMan® (Laerdal Medical, Stavanger, Norway) in Spain.  Two confederates acted as the anaesthesia nurse and surgical nurse throughout each scenario, and a third confederate played the role of an anaesthesia consultant who assisted participants at the conclusion of the scenario. Simulation sessions were conducted in the local language of each centre. Both scenarios were pilot tested in both simulation centres before participant inclusion.  All participants were asked to verbalise their thought processes and clinical reasoning while performing in the simulation to support observation of both technical and non- technical skills. They were also encouraged to ask questions if they identified inconsistencies or missing clinical information arising from the inherent limitations of the simulator or mannequin.  **Assessment of technical skills: Structured Assessment of Clinical Skills in Simulation**  In order to compare trainees’ performance, technical skills were assessed using a scenario-specific instrument, the *Structured Assessment of Clinical Skills in Simulation* (SACSS) (see Additional file 5). For each scenario, the SACSS comprised a scenario-specific checklist (SACSS-checklist) containing 45 items, with final scores reported as percentages, and a 10-domain global rating scale (SACSS-GRS), scored on a five-point Likert scale. The final SACSS-GRS score was calculated as the mean across all domains and expressed as a percentage. The SACSS for each scenario was developed by expert anaesthesiologists and simulation educators to assess competencies derived from the ETR for anaesthesiology (<https://www.uems.eu/european-training-requirements>). The development process and the validity and reliability analyses have been reported previously [28].  **Assessment of non-technical skills**  To compare non-technical skills between groups, the widely used and well validated *Anaesthetists’ Non-Technical Skills* (ANTS) system was used [32, 33].  **Rater training and video-rating process**  Two trained bilingual board-certified anaesthesiologists and experienced simulation educators independently rated all video recordings. Raters were blinded to each other’s assessments and reviewed the recordings in the same randomly generated order using a standard media player. Checklist items were scored in real time, whereas SACSS-GRS and ANTS scores were assigned at the end of each video review. Training in the use of the rating tools has been described previously [28]. |
| Bias | 9 | Describe any efforts to address potential sources of bias |  |  | - |
| Study size | 10 | Explain how the study size was arrived at |  |  | - |

| Quantitative variables | 11 | Explain how quantitative variables were handled in the analyses. If applicable, describe which groupings were chosen and why |  |  | - |
| --- | --- | --- | --- | --- | --- |
| Statistical methods | 12 | (*a*) Describe all statistical methods, including those used to control for confounding  (*b*) Describe any methods used to examine subgroups and interactions  (*c*) Explain how missing data were addressed  (*d*) *Cohort study*—If applicable, explain how loss to follow-up was addressed  *Case-control study*—If applicable, explain how matching of cases and controls was addressed  *Cross-sectional study*—If applicable, describe analytical methods taking account of sampling strategy  (*e*) Describe any sensitivity analyses | Clearly indicate the unit of analysis (e.g., individual, team, system), identify repeated measures on subjects, and describe how these issues were addressed. | 9–10 | **Data collection and statistical methods**  Test results and questionnaires were collected using paper forms. Simulation performances were video-recorded on the computers of the respective simulation facilities. All individual data were managed in pseudonymised form. Descriptive data were summarised as median (interquartile range [IQR]) for quantitative variables and as *n* (%) for categorical variables. Between-group comparisons of quantitative questionnaire data were performed using the Mann-Whitney *U* test. Categorical variables were compared using the chi-square test (χ2) when the expected cell frequency was at least 1 in all cells and fewer than 20% of cells had an expected frequency below 5; otherwise Fisher’s exact test was used. Knowledge test scores and SACSS and ANTS scores were also compared between trainees in Germany and Spain using the Mann-Whitney *U* test. For SACSS and ANTS, the mean of the two raters’ scores was used. A two-sided significance level of 0.05 was applied. Effect size (*r*) was calculated to quantify between-group differences [34]. Missing data were excluded on a variable-by-variable basis. Analyses were performed using SPSS 30.0 (IBM Corp, Armonk, NY, USA). |
| **Results** |  |  |  |  |  |
| Participants | 13 | (a) Report numbers of individuals at each stage of study—eg numbers potentially eligible, examined for eligibility, confirmed eligible, included in the study, completing follow-up, and analysed  (b) Give reasons for non-participation at each stage  (c) Consider use of a flow diagram |  |  | - |
| Descriptive data | 14 | (a) Give characteristics of study participants (eg demographic, clinical, social) and information on exposures and potential confounders  (b) Indicate number of participants with missing data for each variable of interest  (c) *Cohort study*—Summarise follow-up time (eg, average and total amount) | In describing characteristics of study participants, include their previous experience with simulation and other relevant features as related to the intervention(s). | 11  26–27  29–30 | Exposure to simulation training was greater in Spain, where more than 68% of trainees reported participating in at least 5 simulation sessions, compared with more than 85% of German trainees, who reported 4 or fewer sessions.  […]  Table 1  Table 2 |
| Outcome data | 15 | *Cohort study*—Report numbers of outcome events or summary measures over time  *Case-control study—*Report numbers in each exposure category, or summary measures of exposure  *Cross-sectional study—*Report numbers of outcome events or summary measures |  |  |  |
| Main results | 16 | (*a*) Give unadjusted estimates and, if applicable, confounder-adjusted estimates and their precision (eg, 95% confidence interval). Make clear which confounders were adjusted for and why they were included  (*b*) Report category boundaries when continuous variables were categorized  (*c*) If relevant, consider translating estimates of relative risk into absolute risk for a meaningful time period | For assessments involving >1 rater, interrater reliability should be reported. | 15 | The development, validity and reliability of the assessment tools have been reported previously [28]. |

| Other analyses | 17 | Report other analyses done—eg analyses of subgroups and interactions, and sensitivity analyses |  |  | - |
| --- | --- | --- | --- | --- | --- |
| Discussion |
| Key results | 18 | Summarise key results with reference to study objectives |  |  | - |
| Limitations | 19 | Discuss limitations of the study, taking into account sources of potential bias or imprecision. Discuss both direction and magnitude of any potential bias | Specifically discuss the limitations of SBR. | 17  18  18 | The sites also used different high-fidelity mannequins (Human Patient Simulator®, METI®, in Heidelberg; SimMan®, Laerdal, in Barcelona), which differ in airway anatomy, physiological response, and tactile feedback—features directly relevant to several SACSS-checklist items, particularly airway management in Scenario 1. Despite pilot testing, residual platform-specific effects on item-level performance cannot be excluded, and the use of different confederates across sites may have introduced further variability.  […]  Finally, the limited number of scenarios and knowledge test items restricted the breadth of assessment and may have further limited generalisability.  […]  All assessment tools used, including SACSS and ANTS, are susceptible to rater bias; differences in rater training, the absence of formal calibration, and the involvement of one rater in tool development may have affected inter-rater reliability. Video-based assessment with repeated viewing may also limit transferability to real-time contexts. Moreover, simulation cannot fully reproduce clinical practice, and performance in simulated settings may not directly reflect real-world clinical performance. |
| Interpretation | 20 | Give a cautious overall interpretation of results considering objectives, limitations, multiplicity of analyses, results from similar studies, and other relevant evidence |  |  | - |
| Generalisability | 21 | Discuss the generalisability (external validity) of the study results | Describe generalizability of simulation-based outcomes to patient-based outcomes (if applicable). |  | N/A |
| Other information |  |  |
| Funding | 22 | Give the source of funding and the role of the funders for the present study and, if applicable, for the original study on which the present article is based | List simulator brand and if conflict of interest for intellectual property exists. | 8  20 | Different simulation mannequins were used at the two sites: a Human Patient Simulator® (Medical Education Technologies, Inc.®, Sarasota, FL, USA) in Germany, and a SimMan® (Laerdal Medical, Stavanger, Norway) in Spain.  […]  **Funding**  This work was supported by the Department of Anaesthesiology, Heidelberg University (Germany); the Department of Anaesthesiology and Critical Care, *Hospital Clínic de Barcelona* (Spain); and the Skills Laboratory, Faculty of Medicine and Health Sciences, University of Barcelona (Spain). |
