# Supplementary material
Source: Research Square preprint supplement (doi:10.21203/rs.3.rs-9581391/v1)
Supplement: Supplementary file 3 [file 28caf48517de39a6cfb24768.docx]

**ADDITIONAL FILE 3**

**Knowledge test**

Gerard S. Angeles-Fite1,2,3,4,*, Sara García-Ballester5, Federico Migliorelli6,7, Lidia Gómez-López4,8, Beatriz Tena2,4,8, Marina Vendrell2,4,8, Manuel López‐Baamonde4,7,8, Juan M. Perdomo2,4,8, Cristina Ibañez4,8, Raquel Bergé4,8, Tomás Cuñat4,8, Johannes Schäfer1,3, Albert Carramiñana4,8, Miriam F. Panzeri4,8, Ricard Valero2,7,8,9,† and Christopher Neuhaus1,3,†

1Medical Faculty Heidelberg, Department of Anesthesiology, Heidelberg University, Heidelberg, Germany.

2Departament de Cirurgia i Especialitats Medicoquirúrgiques, Facultat de Medicina i Ciències de la Salut, Universitat de Barcelona (UB), Barcelona, Spain.

3Heidelberg Anaesthesia and Emergency Simulation Centre (HANS), Heidelberg University Hospital, Heidelberg, Germany.

4Anaesthesiology Clinical Simulation Group (SIMCLÍNIC), *Hospital Clínic de Barcelona*, Barcelona, Spain.

5Department of Anaesthesiology and Critical Care, Bellvitge University Hospital, University of Barcelona, Hospitalet de Llobregat, Barcelona, Spain.

6BCNatal - Barcelona Center for Maternal-Fetal and Neonatal Medicine (*Hospital Clínic* *and Hospital Sant Joan de Déu*), *Institut Clínic de Ginecologia, Obstetrícia i Neonatologia*, Fetal i+D Fetal Medicine Research Center, Barcelona, Spain.

7Institut d’Investigacions Biomèdiques August Pi i Sunyer (IDIBAPS), Barcelona, Spain.

8Department of Anaesthesiology and Critical Care, *Hospital Clínic de Barcelona*, Barcelona, Spain.

9*Centro de Investigación Biomédica en Red de Salud Mental* (CIBERSAM), *Instituto de Salud Carlos III* (ISCIII), Spain

*Correspondence to: Gerard Sergi Angeles Fite, Department of Anaesthesiology and Intensive Care, Bürgerspital Solothurn, Schöngrünstrasse 42, 4500 Solothurn, Switzerland; Tel: +41326274041; E-mail: gerardsergi.angeles@gmail.com

†Contributed equally to this work

**KNOWLEDGE TEST**

This quiz consists of 20 multiple-choice questions. Each question has five answers: A, B, C, D and E. Each answer may be correct or incorrect, i.e. it is possible that all five answers to a question are correct, all are incorrect, or any combination in between.

Please transfer your answers to the “ANSWER SHEET” (see last page).

One mark is awarded for each correct choice. THERE ARE NO DEDUCTIONS FOR AN INCORRECT CHOICE. No marks are awarded for an unanswered item. ALL QUESTIONS SHOULD BE ANSWERED.

1. **In the normal pulmonary vascular bed**

A. the mean arterial pressure is half the mean aortic pressure

B. the vascular resistance is lower than the systemic vascular resistance

C. 50% of the total blood volume is present at rest

D. the wedge pressure equals the capillary pressure

E. hypoxia causes dilation of vessels

1. **Closing capacity**

A. normally exceeds residual volume

B. decreases in the supine position

C. is the sum of closing volume and residual volume

D. decreases with age

E. is normally less than functional residual capacity

1. **Cytochrome P450**

A. is an enzyme which regulates the speed of oxygen release from haemoglobin B. is present in sympathetic nerve endings

C. participates in the metabolism of noradrenaline

D. is a terminal oxidase important in biotransformation of drugs

E. is a potent enzyme inducer

1. **Concerning Propofol**

A. it has a high clearance rate in excess of liver blood flow

B. extra-hepatic metabolism occurs to a significant extent

C. significant reduction in the volume of distribution occurs in elderly patients D. it may induce burst suppression of EEG activity

E. clearance is 870-2140 mI/min

1. **Platelet aggregation is reduced by**

A. acetylsalicylic acid

B. dipyridamole

C. tranexamic acid

D. ketorolac

E. dextran

1. **Concerning high frequency jet ventilation**

A. minute volume ventilation is independent of the entrained gas

B. an increase in l/E ratio increases the lung volume

C. a decrease in driving pressure causes a decrease in PaCO2

D. it is contraindicated in patients with broncho-pleural fistula

E. CO2 elimination is improved by increasing the frequency

1. **The reaction of carbon dioxide with soda lime includes the**

A. formation of sodium carbonate

B. formation of calcium carbonate

C. release of heat

D. release of water

E. production of carbon monoxide

1. **Recognised methods of effectively reducing operating room concentrations of waste volatile anaesthetic gases include**

A. the use of a condenser humidifier

B. the use of low flow anaesthesia

C. piping waste gases to floor level

D. passing waste gases through activated charcoal

E. passive ducting to the external atmosphere

1. **Concerning heat loss during anaesthesia:**

A. conduction is the most important phenomenon

B. convection is decreased when the air adjacent to the body is warm

C. radiation is decreased by aluminium foil blankets

D. respiration equals 30% of the total heat loss

E. sweating is decreased when the relative humidity increases

1. **Pressure in the superior vena cava is influenced by the**

A. right ventricular performance

B. position of the patient

C. intra-abdominal pressure

D. mean airway pressure

E. competence of the tricuspid valve

1. **Mechanical hyperventilation in a normal patient during the entire course of anaesthesia is associated with**

A. markedly diminished requirements for post-operative analgesia

B. a shift to the right of the oxyhaemoglobin dissociation curve

C. a decrease in PaO2

D. postoperative hypoventilation

E. cutaneous vasodilatation

1. **Predictors of cardiac morbidity and mortality include**

A. aortic stenosis

B. myocardial infarction occurring 2 months previously

C. a prolonged QT (frequency corrected) interval

D. occasional ventricular extra-systoles

E. intra-operative nodal rhythm

1. **Recognised complications of abdomino-perineal resection of the rectum include**

A. deep venous thrombosis

B. paralytic ileus

C. air embolism

D. postoperative atelectasis

E. uraemia

1. **In the diagnosis of brain-stem death**

A. clinical criteria are invalid in a hypothermic patient

B. caloric testing is used to test the integrity of the Vth cranial nerve

C. an isoelectric EEG is pathognomonic

D. absence of neuromuscular blockade should be confirmed with a peripheral nerve stimulator

E. reflex movements of the legs may still occur

1. **The umbilical arteries**

A. originate from the foetal internal iliac arteries

B. convey venous blood from the foetus

C. contain blood at a PO2 of 5.3 KPa (40mmHg)

D. insert into the foetal inferior vena cava

E. are unaffected by autoregulation

1. **Meralgia paraesthetica is relieved by nerve block of the**

A. lingual nerve

B. trigeminal nerve

C. lateral femoral cutaneous nerve

D. lumbar sympathetic nerve

E. femoral nerve

1. **Likely causes of coagulopathy in a patient who becomes septic following colonic resection include:**

A. deficiency of vitamin K

B. liver damage due to halothane

C. disseminated intravascular coagulation

D. unsuspected von Willebrand’s disease

E. administration of low-dose subcutaneous heparin

1. **Decompression sickness**

A. is associated with avascular necrosis of bone

B. is due to an alveolar oxygen deficit

C. is cured by breathing a mixture of oxygen and helium at atmospheric pressure

D. symptoms can occur four hours after the initial drop in pressure

E. is avoided if nitrogen is included in the inspired gas mixture

1. **The “blood-brain barrier”**

A. is formed by the arachnoid villi

B. is less permeable in the new-born

C. is freely permeable to bicarbonate ions

D. does not permit free passage of organic anions

E. has similar functional characteristics to a cell membrane

1. **Differential diagnoses of an enlarged heart shadow observed on a chest X-ray include**

A. congestive cardiac failure

B. pericardial effusion

C. mitral valve disease

D. hypertrophic subaortic stenosis

E. hiatus hernia

**Answer sheet:**

Next to each question number there are five columns, labelled A, B, C, D and E. In each column there are two boxes, marked “T” (TRUE) and “F” (FALSE). Tick the appropriate box for each answer.

| Question | A | | B | | C | | D | | E | |  |
| --- | --- | --- | --- | --- | --- | --- | --- | --- | --- | --- | --- |
| 1 | T | F | T | F | T | F | T | F | T | F |  |
| 2 | T | F | T | F | T | F | T | F | T | F |  |
| 3 | T | F | T | F | T | F | T | F | T | F |  |
| 4 | T | F | T | F | T | F | T | F | T | F |  |
| 5 | T | F | T | F | T | F | T | F | T | F |  |
| 6 | T | F | T | F | T | F | T | F | T | F |  |
| 7 | T | F | T | F | T | F | T | F | T | F |  |
| 8 | T | F | T | F | T | F | T | F | T | F |  |
| 9 | T | F | T | F | T | F | T | F | T | F |  |
| 10 | T | F | T | F | T | F | T | F | T | F |  |
| 11 | T | F | T | F | T | F | T | F | T | F |  |
| 12 | T | F | T | F | T | F | T | F | T | F |  |
| 13 | T | F | T | F | T | F | T | F | T | F |  |
| 14 | T | F | T | F | T | F | T | F | T | F |  |
| 15 | T | F | T | F | T | F | T | F | T | F |  |
| 16 | T | F | T | F | T | F | T | F | T | F |  |
| 17 | T | F | T | F | T | F | T | F | T | F |  |
| 18 | T | F | T | F | T | F | T | F | T | F |  |
| 19 | T | F | T | F | T | F | T | F | T | F |  |
| 20 | T | F | T | F | T | F | T | F | T | F |  |

**Correct answers**

| **Question number** | **A** | **B** | **C** | **D** | **E** |
| --- | --- | --- | --- | --- | --- |
| **1** | F | T | F | T | F |
| **2** | T | T | T | F | T |
| **3** | F | F | F | T | F |
| **4** | T | T | F | T | T |
| **5** | T | T | F | T | T |
| **6** | F | T | F | F | F |
| **7** | T | T | T | T | F |
| **8** | F | T | F | T | F |
| **9** | F | T | T | F | T |
| **10** | T | T | T | T | T |
| **11** | F | F | F | T | F |
| **12** | T | T | T | F | F |
| **13** | T | T | F | T | F |
| **14** | T | F | F | T | T |
| **15** | T | T | F | F | F |
| **16** | F | F | T | F | F |
| **17** | F | F | T | F | F |
| **18** | T | F | F | T | F |
| **19** | F | F | F | T | T |
| **20** | T | T | T | T | T |
