# Supplementary material
Source: Research Square preprint supplement (doi:10.21203/rs.3.rs-9581391/v1)
Supplement: Supplementary file 4 [file 6bf8d97b11687e97a62725f1.docx]

**ADDITIONAL FILE 6**

**Supplementary results**

Gerard S. Angeles-Fite1,2,3,4,*, Sara García-Ballester5, Federico Migliorelli6,7, Lidia Gómez-López4,8, Beatriz Tena2,4,8, Marina Vendrell2,4,8, Manuel López‐Baamonde4,7,8, Juan M. Perdomo2,4,8, Cristina Ibañez4,8, Raquel Bergé4,8, Tomás Cuñat4,8, Johannes Schäfer1,3, Albert Carramiñana4,8, Miriam F. Panzeri4,8, Ricard Valero2,7,8,9,† and Christopher Neuhaus1,3,†

1Medical Faculty Heidelberg, Department of Anesthesiology, Heidelberg University, Heidelberg, Germany.

2Departament de Cirurgia i Especialitats Medicoquirúrgiques, Facultat de Medicina i Ciències de la Salut, Universitat de Barcelona (UB), Barcelona, Spain.

3Heidelberg Anaesthesia and Emergency Simulation Centre (HANS), Heidelberg University Hospital, Heidelberg, Germany.

4Anaesthesiology Clinical Simulation Group (SIMCLÍNIC), *Hospital Clínic de Barcelona*, Barcelona, Spain.

5Department of Anaesthesiology and Critical Care, Bellvitge University Hospital, University of Barcelona, Hospitalet de Llobregat, Barcelona, Spain.

6BCNatal - Barcelona Center for Maternal-Fetal and Neonatal Medicine (*Hospital Clínic* *and Hospital Sant Joan de Déu*), *Institut Clínic de Ginecologia, Obstetrícia i Neonatologia*, Fetal i+D Fetal Medicine Research Center, Barcelona, Spain.

7Institut d’Investigacions Biomèdiques August Pi i Sunyer (IDIBAPS), Barcelona, Spain.

8Department of Anaesthesiology and Critical Care, *Hospital Clínic de Barcelona*, Barcelona, Spain.

9*Centro de Investigación Biomédica en Red de Salud Mental* (CIBERSAM), *Instituto de Salud Carlos III* (ISCIII), Spain

*Correspondence to: Gerard Sergi Angeles Fite, Department of Anaesthesiology and Intensive Care, Bürgerspital Solothurn, Schöngrünstrasse 42, 4500 Solothurn, Switzerland; Tel: +41326274041; E-mail: gerardsergi.angeles@gmail.com

†Contributed equally to this work

**Table of contents**

[Table A1. Scores for individual items of the SACSS-checklist for Scenario 1 (rater 1) 3](#_Toc227336786)

[Table A2. Scores for individual items of the SACSS-checklist for Scenario 1 (rater 2) 5](#_Toc227336787)

[Table A3. Scores for individual items of the SACSS-checklist for Scenario 2 (rater 1) 7](#_Toc227336788)

[Table A4. Scores for individual items of the SACSS-checklist for Scenario 2 (rater 2) 9](#_Toc227336789)

[Table A5. Scores for individual elements of the SACSS-GRS for Scenario 1 (rater 1) 11](#_Toc227336790)

[Table A6. Scores for individual elements of the SACSS-GRS for Scenario 1 (rater 2) 11](#_Toc227336791)

[Table A7. Scores for individual elements of the SACSS-GRS for Scenario 2 (rater 1) 12](#_Toc227336792)

[Table A8. Scores for individual elements of the SACSS-GRS for Scenario 2 (rater 2) 12](#_Toc227336793)

[Table A9. Scores for individual elements of the ANTS for Scenario 1 (rater 1) 13](#_Toc227336794)

[Table A10. Scores for individual elements of the ANTS for Scenario 1 (rater 2) 14](#_Toc227336795)

[Table A11. Scores for individual elements of the ANTS for Scenario 2 (rater 1) 15](#_Toc227336796)

[Table A12. Scores for individual elements of the ANTS for Scenario 2 (rater 2) 16](#_Toc227336797)

[Table A13. General assessment of simulation for scenario 1 17](#_Toc227336798)

[Table A14. Assessment simulation scenario 1 by country of training 17](#_Toc227336799)

[Table A15. General assessment of simulation for scenario 2 18](#_Toc227336800)

[Table A16. Assessment simulation scenario 2 by country of training 18](#_Toc227336801)

[References 19](#_Toc227336802)

## Table A1. Scores for individual items of the SACSS-checklist for Scenario 1 (rater 1)

| SACSS-checklist item | Country of training | | Chi-square  *(χ 2*) | Cramér‘s *V* b | *p*-value c |
| --- | --- | --- | --- | --- | --- |
| Germany  (*n* = 24) a | Spain  (*n*= 19)  a |
| Patient identity verified | 22 (91.7%) | 16 (84.2%) | N/A | N/A | 0.640 d |
| Procedure confirmed | 22 (91.7%) | 11 (57.9%) | N/A | N/A | **0.013** d |
| Airway difficulty /aspiration risk assessed | 13 (54.2%) | 10 (52.6%) | 0.010 | 0.015 | 1.000 |
| Known allergies checked | 20 (83.3%) | 15 (78.9%) | N/A | N/A | 1.000 d |
| Anaesthesia equipment checked | 16 (66.7%) | 8 (42.1%) | 2.594 | 0.246 | 0.132 d |
| Anaesthesia medications checked | 20 (83.3%) | 13 (68.4%) | N/A | N/A | 0.295 d |
| Patient’s anaesthetic risk assessed | 15 (62.5%) | 4 (21.1%) | 7.387 | 0.414 | **0.013** |
| i.v. line patency checked | 15 (62.5%) | 13 (68.4%) | 0.164 | 0.062 | 0.755 |
| Antibiotic infusion stopped | 16 (66.7%) | 8 (42.1%) | 2.594 | 0.246 | 0.132 |
| SpO2 status verbalised | 1 (4.2%) | 1 (5.3%) | N/A | N/A | 1.000 d |
| Loss of consciousness confirmed | 19 (79.2%) | 14 (73.7%) | N/A | N/A | 0.728 d |
| Time since muscle relaxant administration controlled | 19 (79.2%) | 11 (57.9%) | 2.275 | 0.230 | 0.185 |
| Reclination/head position/jaw thrust optimised | 14 (58.3%) | 9 (47.4%) | 0.512 | 0.109 | 0.547 |
| Uses Guedel airway | 13 (54.2%) | 15 (78.9%) | 2.867 | 0.258 | 0.116 |
| Requests help for two-person bag-valve-mask ventilation | 13 (54.2%) | 10 (52.6%) | 0.010 | 0.015 | 1.000 |
| Administers supplemental hypnotic | 3 (12.5%) | 3 (15.8%) | N/A | N/A | 1.000 d |
| Administers supplemental muscle relaxant | 1 (4.2%) | 1 (5.3%) | N/A | N/A | 1.000 d |
| Verbalises problem (Cormack-Lehane III-IV), declares “can’t intubate” situation | 24 (100.0%) | 18 (94.7%) | N/A | N/A | 0.442 d |
| Calls second staff anaesthesiologist for help | 24 (100.0%) | 16 (84.2%) | N/A | N/A | 0.079 d |
| Performs bag-valve-mask ventilation after laryngoscopy /between attempts | 24 (100.0%) | 19 (100.0%) | N/A | N/A | N/A |
| Considers/uses "Backward Upward Rightward Pressure (BURP)"/ "Optimum External Laryngeal Manipulation (OELM)" | 11 (45.8%) | 4 (21.1%) | 2.867 | 0.258 | 0.116 |
| Considers/uses alternative intubation tools (different laryngoscope blade / different laryngoscope (McCoy) / intubation stylet) | 4 (16.7%) | 3 (15.8%) | N/A | N/A | 1.000 d |
| Total direct laryngoscopy attempts? (1–2 attempts = 1 pt; 0 or >2 attempts = 0 pts) | 24 (100.0%) | 19 (100.0%) | N/A | N/A | N/A |
| Requests videolaryngoscope | 16 (66.7%) | 11 (57.9%) | 0.349 | 0.090 | 0.752 |
| Uses videolaryngoscope | 21 (87.5%) | 15 (78.9%) | N/A | N/A | 0.680 d |
| Total videolaryngoscopy attempts? (1–2 attempts = 1 pt; 0 or >2  attempts = 0 pts) | 21 (87.5%) | 17 (89.5%) | N/A | N/A | 1.000 d |
| Requests fibrobronchoscope / difficult airway trolley | 18 (75.0%) | 8 (42.1%) | 4.800 | 0.334 | 0.058 |
| Uses fibrobronchoscope | 5 (20.8%) | 3 (15.8%) | N/A | N/A | 1.000 d |
| Places laryngeal mask airway | 20 (83.3%) | 10 (52.6%) | 4.739 | 0.332 | **0.046** |
| Rejects the option to wake up the patient | 24 (100.0%) | 17 (89.5%) | N/A | N/A | 0.189 d |
| Declares “cannot intubate, cannot oxygenate” situation | 19 (79.2%) | 14 (73.7%) | N/A | N/A | 0.728 d |
| Identifies need for emergent surgical airway  (coniotomy/tracheostomy) | 15 (62.5%) | 19 (100.0%) | N/A | N/A | **0.002** d |
| Performs coniotomy | 9 (37.5%) | 16 (84.2%) | 9.507 | 0.470 | **0.004** |
| Places laryngeal mask airway (1 pt if previously done) | 20 (83.3%) | 11 (57.9%) | 3.411 | 0.282 | 0.091 |
| Attempts ventilation during surgical airway management | 14 (58.3%) | 9 (47.4%) | 0.512 | 0.109 | 0.547 |
| Calls surgeon (general/ENT) for help in surgical airway management | 6 (25.0%) | 16 (84.2%) | 14.880 | 0.588 | **<0.001** |
| Verbalises suspected diagnosis of anaphylaxis / angioedema | 20 (83.3%) | 15 (78.9%) | N/A | N/A | 1.000 d |
| Administers adrenaline 0.5mg i.m. (or repeatedly 20-50ug i.v.) | 18 (75.0%) | 15 (78.9%) | N/A | N/A | 1.000 d |
| Administers H1-receptor antagonist i.v. | 14 (58.3%) | 3 (15.8%) | 8.029 | 0.432 | **0.006** |
| Administers glucocorticoid i.v. | 14 (58.3%) | 14 (73.7%) | 1.100 | 0.160 | 0.349 |
| Considers repeating adrenaline administration (0.5mg i.m. or 20-50ug i.v.) | 7 (29.2%) | 6 (31.6%) | 0.029 | 0.026 | 1.000 |
| Assesses need to cancel/postpone surgery | 4 (16.7%) | 5 (26.3%) | N/A | N/A | 0.477 d |
| Plans ICU admission | 3 (12.5%) | 4 (21.1%) | N/A | N/A | 0.680 d |
| Reports/records unexpected difficult airway | 1 (4.2%) | 0 (0.0%) | N/A | N/A | 1.000 d |
| Considers serum tryptase/IgE testing | 0 (0.0%) | 0 (0.0%) | N/A | N/A | N/A |
| (a) Results are presented as absolute and relative frequencies of correctly performed measures; (b) Interpretation of association strength according to Cramér‘s *V*: 0.10≤*V*<0.30: small effect; 0.30≤*V*<0.50: medium effect; *V*≥0.50: large effect 2; (c) two-tailed *p*-value; statistically significant results are highlighted in bold; (d) Fisher’s exact test was used when the assumptions for the *χ 2* test were not met; N/A: not applicable. | | | | | |

## Table A2. Scores for individual items of the SACSS-checklist for Scenario 1 (rater 2)

| SACSS-checklist item | Country of training | | Chi-square  *(χ 2*) | Cramér‘s *V* b | *p*-value c |
| --- | --- | --- | --- | --- | --- |
| Germany  (*n* = 24) a | Spain  (*n*= 19)  a |
| Patient identity verified | 22 (91.7%) | 18 (94.7%) | N/A | N/A | 1.000 |
| Procedure confirmed | 21 (87.5%) | 9 (47.4%) | 8.097 | 0.434 | **0.007** d |
| Airway difficulty /aspiration risk assessed | 18 (75.0%) | 15 (78.9%) | N/A | N/A | 1.000 d |
| Known allergies checked | 20 (83.3%) | 16 (84.2%) | N/A | N/A | 1.000 d |
| Anaesthesia equipment checked | 17 (70.8%) | 9 (47.4%) | 2.443 | 0.238 | 0.209 |
| Anaesthesia medications checked | 19 (79.2%) | 16 (84.2%) | N/A | N/A | 1.000 d |
| Patient’s anaesthetic risk assessed | 8 (33.3%) | 3 (15.8%) | N/A | N/A | 0.294 d |
| i.v. line patency checked | 13 (54.2%) | 11 (57.9%) | 0.060 | 0.037 | 1.000 |
| Antibiotic infusion stopped | 11 (45.8%) | 8 (42.1%) | 0.060 | 0.037 | 1.000 |
| SpO2 status verbalised | 5 (20.8%) | 1 (5.3%) | N/A | N/A | 0.205 d |
| Loss of consciousness confirmed | 17 (70.8%) | 12 (63.2%) | 0.285 | 0.081 | 0.745 |
| Time since muscle relaxant administration controlled | 16 (66.7%) | 10 (52.6%) | 0.874 | 0.143 | 0.531 |
| Reclination/head position/jaw thrust optimised | 18 (75.0%) | 14 (73.7%) | N/A | N/A | 1.000 d |
| Uses Guedel airway | 11 (45.8%) | 10 (52.6%) | 0.196 | 0.068 | 0.763 |
| Requests help for two-person bag-valve-mask ventilation | 4 (16.7%) | 7 (36.8%) | N/A | N/A | 0.170 d |
| Administers supplemental hypnotic | 3 (12.5%) | 0 (0.0%) | N/A | N/A | 0.243 d |
| Administers supplemental muscle relaxant | 1 (4.2%) | 0 (0.0%) | N/A | N/A | 1.000 d |
| Verbalises problem (Cormack-Lehane III-IV), declares “can’t intubate” situation | 17 (70.8%) | 19 (100.0%) | N/A | N/A | **0.012** d |
| Calls second staff anaesthesiologist for help | 24 (100.0%) | 19 (100.0%) | N/A | N/A | N/A |
| Performs bag-valve-mask ventilation after laryngoscopy /between attempts | 20 (83.3%) | 18 (94.7%) | N/A | N/A | 0.363 d |
| Considers/uses "Backward Upward Rightward Pressure (BURP)"/ "Optimum External Laryngeal Manipulation (OELM)" | 4 (16.7%) | 4 (21.1%) | N/A | N/A | 1.000 d |
| Considers/uses alternative intubation tools (different laryngoscope blade / different laryngoscope (McCoy) / intubation stylet) | 3 (12.5%) | 2 (10.5%) | N/A | N/A | 1.000 d |
| Total direct laryngoscopy attempts? (1–2 attempts = 1 pt; 0 or >2 attempts = 0 pts) | 24 (100.0%) | 19 (100.0%) | N/A | N/A | N/A |
| Requests videolaryngoscope | 17 (70.8%) | 17 (89.5%) | N/A | N/A | 0.257 d |
| Uses videolaryngoscope | 20 (83.3%) | 18 (94.7%) | N/A | N/A | 0.363 d |
| Total videolaryngoscopy attempts? (1–2 attempts = 1 pt; 0 or >2  attempts = 0 pts) | 21 (87.5%) | 18 (94.7%) | N/A | N/A | 0.618 d |
| Requests fibrobronchoscope / difficult airway trolley | 12 (50.0%) | 8 (42.1%) | 0.266 | 0.079 | 0.760 |
| Uses fibrobronchoscope | 3 (12.5%) | 3 (15.8%) | N/A | N/A | 1.000 d |
| Places laryngeal mask airway | 17 (70.8%) | 9 (47.4%) | 2.443 | 0.238 | 0.209 |
| Rejects the option to wake up the patient | 0 (0.0%) | 2 (10.5%) | N/A | N/A | 0.189 d |
| Declares “cannot intubate, cannot oxygenate” situation | 22 (91.7%) | 19 (100.0%) | N/A | N/A | 0.495 d |
| Identifies need for emergent surgical airway  (coniotomy/tracheostomy) | 16 (66.7%) | 17 (89.5%) | N/A | N/A | 0.145 d |
| Performs coniotomy | 21 (87.5%) | 17 (89.5%) | N/A | N/A | 1.000 d |
| Places laryngeal mask airway (1 pt if previously done) | 8 (33.3%) | 5 (26.3%) | 0.248 | 0.076 | 0.743 |
| Attempts ventilation during surgical airway management | 17 (70.8%) | 8 (42.1%) | 3.596 | 0.289 | 0.071 |
| Calls surgeon (general/ENT) for help in surgical airway management | 5 (20.8%) | 17 (89.5%) | 19.996 | 0.682 | **<0.001** |
| Verbalises suspected diagnosis of anaphylaxis / angioedema | 20 (83.3%) | 14 (73.7%) | N/A | N/A | 0.477 d |
| Administers adrenaline 0.5mg i.m. (or repeatedly 20-50ug i.v.) | 16 (66.7%) | 15 (78.9%) | 0.795 | 0.136 | 0.500 |
| Administers H1-receptor antagonist i.v. | 9 (37.5%) | 3 (15.8%) | 2.484 | 0.240 | 0.174 |
| Administers glucocorticoid i.v. | 14 (58.3%) | 13 (68.4%) | 0.462 | 0.104 | 0.542 |
| Considers repeating adrenaline administration (0.5mg i.m. or 20-50ug i.v.) | 8 (33.3%) | 9 (47.4%) | 0.874 | 0.143 | 0.531 |
| Assesses need to cancel/postpone surgery | 2 (8.3%) | 3 (15.8%) | N/A | N/A | 0.640 d |
| Plans ICU admission | 1 (4.2%) | 4 (21.1%) | N/A | N/A | 0.153 d |
| Reports/records unexpected difficult airway | 2 (8.3%) | 1 (5.3%) | N/A | N/A | 1.000 d |
| Considers serum tryptase/IgE testing | 0 (0.0%) | 0 (0.0%) | N/A | N/A | N/A |
| (a) Results are presented as absolute and relative frequencies of correctly performed measures; (b) Interpretation of association strength according to Cramér‘s *V*: 0.10≤*V*<0.30: small effect; 0.30≤*V*<0.50: medium effect; *V*≥0.50: large effect 2; (c) two-tailed *p*-value; statistically significant results are highlighted in bold; (d) Fisher’s exact test was used when the assumptions for the *χ 2* test were not met; N/A: not applicable. | | | | | |

## Table A3. Scores for individual items of the SACSS-checklist for Scenario 2 (rater 1)

| SACSS-checklist item | Country of training | | Chi-square  *(χ 2*) | Cramér‘s *V* b | *p*-value c |
| --- | --- | --- | --- | --- | --- |
| Germany  (*n* = 24) a | Spain  (*n*= 18)  a |
| Recognises tachycardia | 23 (95.8%) | 18 (100.0%) | N/A | N/A | 1.000 d |
| Recognises hypertension | 23 (95.8%) | 18 (100.0%) | N/A | N/A | 1.000 d |
| Diagnosis seizure under general anaesthesia | 24 (100.0%) | 17 (94.4%) | N/A | N/A | 0.429 d |
| Administers sedative-hypnotic medication | 23 (95.8%) | 17 (94.4%) | N/A | N/A | 1.000 d |
| Calls staff anaesthesiologist for help | 22 (91.7%) | 16 (88.9%) | N/A | N/A | 1.000 d |
| Examines the pupils | 12 (50.0%) | 3 (16.7%) | 4.978 | 0.344 | **0.049** |
| Performs arterial blood gas (ABG) analysis | 14 (58.3%) | 7 (38.9%) | 1.556 | 0.192 | 0.350 |
| Recognises bradycardia | 23 (95.8%) | 17 (94.4%) | N/A | N/A | 1.000 d |
| Administers atropine i.v. | 15 (62.5%) | 13 (72.2%) | 0.437 | 0.102 | 0.742 |
| Considers external pacing | 0 (0.0%) | 4 (22.2%) | N/A | N/A | **0.027** d |
| Requests defibrillator | 0 (0.0%) | 9 (50.0%) | N/A | N/A | **<0.001** d |
| Recognises hypotension | 24 (100.0%) | 18 (100.0%) | N/A | N/A | N/A |
| Administers i.v. vasopressor bolus | 22 (91.7%) | 17 (94.4%) | N/A | N/A | 1.000d |
| Administers i.v. fluid bolus | 6 (25.0%) | 5 (27.8%) | N/A | N/A | 1.000d |
| Recognises and verbalises cardiac arrest with pulseless electrical activity | 23 (95.8%) | 16 (88.9%) | N/A | N/A | 0.567d |
| Calls staff anaesthesiologist for help (1 pt if previously done) | 23 (95.8%) | 15 (83.3%) | N/A | N/A | 0.297d |
| Requests defibrillator (1 pt if previously done) | 20 (83.3%) | 15 (83.3%) | N/A | N/A | 1.000d |
| Starts (or delegates initiation of) chest compressions | 24 (100.0%) | 13 (72.2%) | N/A | N/A | **0.010** d |
| Provides continuous chest compressions (secured airway) | 24 (100.0%) | 16 (88.9%) | N/A | N/A | 0.178d |
| Assesses and gives feedback on quality of chest compressions | 5 (20.8%) | 11 (61.1%) | 7.076 | 0.410 | **0.011** d |
| Administers (or verbalises) O2 with FiO2 1.0 | 15 (62.5%) | 5 (27.8%) | 4.972 | 0.344 | **0.033** |
| Reviews (or verbalises) the EtCO2 tracing | 13 (54.2%) | 7 (38.9%) | 0.963 | 0.151 | 0.366 |
| Provides effective ventilation: switches to manual ventilation / verbalises adjusting to volume controlled ventilation and increasing Pmax | 8 (33.3%) | 7 (38.9%) | 0.138 | 0.057 | 0.754 |
| Administers adrenaline 1mg i.v. at the start of resuscitation (<1min) | 14 (58.3%) | 16 (88.9%) | 4.706 | 0.335 | **0.042** |
| Performs a rhythm check after 2 min of chest compressions | 19 (79.2%) | 18 (100.0%) | N/A | N/A | 0.060d |
| Recognises ventricular fibrillation | 15 (62.5%) | 18 (100.0%) | N/A | N/A | **0.005** d |
| Performs a defibrillation (shock) | 19 (79.2%) | 18 (100.0%) | N/A | N/A | 0.060d |
| Administers second dose of adrenaline after 3-5min | 12 (50.0%) | 9 (50.0%) | <0.001 | <0.001 | 1.000 |
| Minimises interruption of chest compressions | 15 (62.5%) | 5 (27.8%) | 4.972 | 0.344 | **0.033** |
| Makes a differential diagnosis of reversible causes of cardiac arrest | 14 (58.3%) | 1 (5.6%) | 12.479 | 0.545 | **<0.001** |
| Performs an arterial blood gas (ABG) to identify reversible causes (1 pt. if previously done) | 18 (75.0%) | 8 (44.4%) | 4.072 | 0.311 | 0.059 |
| Considers ultrasound imaging to identify reversible causes | 6 (25.0%) | 0 (0.0%) | N/A | N/A | **0.029** d |
| Considers administration of amiodarone (after third shock) | 7 (29.2%) | 6 (33.3%) | 0.084 | 0.045 | 1.000 |
| Considers need for eCPR /ECLS (V–A ECMO) | 2 (8.3%) | 3 (16.7%) | N/A | N/A | 0.636d |
| Applies ABCDE Approach | 1 (4.2%) | 0 (0.0%) | N/A | N/A | 1.000 d |
| Aims for SpO2 94–98% and normal PaCO2 | 0 (0.0%) | 0 (0.0%) | N/A | N/A | N/A |
| Administers vasopressors after ROSC | 9 (37.5%) | 15 (83.3%) | 8.823 | 0.458 | **0.004** |
| Seeks to perform a 12-lead ECG | 0 (0.0%) | 0 (0.0%) | N/A | N/A | N/A |
| Aims for targeted temperature management | 0 (0.0%) | 0 (0.0%) | N/A | N/A | N/A |
| States suspected diagnosis of local anaesthetics systemic toxicity | 19 (79.2%) | 18 (100.0%) | N/A | N/A | 0.060d |
| Asks nurse to bring lipid emulsion | 14 (58.3%) | 17 (94.4%) | N/A | N/A | **0.012** d |
| Administers initial bolus of lipid emulsion in adequate dose (1.5ml/kg in 1 minute) | 5 (20.8%) | 9 (50.0%) | 3.938 | 0.306 | 0.096 |
| Initiates infusion of lipid emulsion | 5 (20.8%) | 17 (94.4%) | 22.344 | 0.729 | **<0.001** |
| Verbalises need to cancel surgery | 5 (20.8%) | 5 (27.8%) | N/A | N/A | 0.720 d |
| Plans ICU admission | 1 (4.2%) | 3 (16.7%) | N/A | N/A | 0.297 d |
| (a) Results are presented as absolute and relative frequencies of correctly performed measures; (b) Interpretation of association strength according to Cramér‘s *V*: 0.10≤*V*<0.30: small effect; 0.30≤*V*<0.50: medium effect; *V*≥0.50: large effect 2; (c) two-tailed *p*-value; statistically significant results are highlighted in bold; (d) Fisher’s exact test was used when the assumptions for the *χ 2* test were not met; N/A: not applicable. | | | | | |

## Table A4. Scores for individual items of the SACSS-checklist for Scenario 2 (rater 2)

| SACSS-checklist item | Country of training | | Chi-square  *(χ 2*) | Cramér‘s *V* b | *p*-value c |
| --- | --- | --- | --- | --- | --- |
| Germany  (*n* = 24) a | Spain  (*n*= 18)  a |
| Recognises tachycardia | 8 (33.3%) | 14 (77.8%) | 8.145 | 0.440 | **0.006** |
| Recognises hypertension | 6 (25.0%) | 15 (83.3%) | 14.000 | 0.577 | **<0.001** |
| Diagnosis seizure under general anaesthesia | 21 (87.5%) | 15 (83.3%) | N/A | N/A | 1.000d |
| Administers sedative-hypnotic medication | 24 (100.0%) | 18 (100.0%) | N/A | N/A | N/Ad |
| Calls staff anaesthesiologist for help | 22 (91.7%) | 16 (88.9%) | N/A | N/A | 1.000d |
| Examines the pupils | 12 (50.0%) | 4 (22.2%) | 3.365 | 0.283 | 0.109 |
| Performs arterial blood gas (ABG) analysis | 14 (58.3%) | 7 (38.9%) | 1.556 | 0.192 | 0.350 |
| Recognises bradycardia | 16 (66.7%) | 14 (77.8%) | 0.622 | 0.122 | 0.506 |
| Administers atropine i.v. | 15 (62.5%) | 14 (77.8%) | 1.123 | 0.164 | 0.333 |
| Considers external pacing | 0 (0.0%) | 3 (16.7%) | N/A | N/A | 0.071d |
| Requests defibrillator | 4 (16.7%) | 7 (38.9%) | N/A | N/A | 0.159d |
| Recognises hypotension | 22 (91.7%) | 17 (94.4%) | N/A | N/A | 1.000d |
| Administers i.v. vasopressor bolus | 22 (91.7%) | 16 (88.9%) | N/A | N/A | 1.000d |
| Administers i.v. fluid bolus | 1 (4.2%) | 5 (27.8%) | N/A | N/A | 0.068d |
| Recognises and verbalises cardiac arrest with pulseless electrical activity | 24 (100.0%) | 13 (72.2%) | N/A | N/A | **0.010** d |
| Calls staff anaesthesiologist for help (1 pt if previously done) | 24 (100.0%) | 17 (94.4%) | N/A | N/A | 0.429d |
| Requests defibrillator (1 pt if previously done) | 16 (76.2%) | 17 (94.4%) | N/A | N/A | 0.190d |
| Starts (or delegates initiation of) chest compressions | 24 (100.0%) | 17 (94.4%) | N/A | N/A | 0.429d |
| Provides continuous chest compressions (secured airway) | 24 (100.0%) | 15 (83.3%) | N/A | N/A | 0.071d |
| Assesses and gives feedback on quality of chest compressions | 7 (29.2%) | 8 (44.4%) | 1.046 | 0.158 | 0.347 |
| Administers (or verbalises) O2 with FiO2 1.0 | 12 (50.0%) | 5 (27.8%) | 2.108 | 0.224 | 0.208 |
| Reviews (or verbalises) the EtCO2 tracing | 9 (37.5%) | 5 (29.4%) | 0.290 | 0.084 | 0.742 |
| Provides effective ventilation: switches to manual ventilation / verbalises adjusting to volume controlled ventilation and increasing Pmax | 9 (37.5%) | 5 (27.8%) | 0.438 | 0.102 | 0.742 |
| Administers adrenaline 1mg i.v. at the start of resuscitation (<1min) | 15 (62.5%) | 12 (66.7%) | 0.078 | 0.043 | 1.000 |
| Performs a rhythm check after 2 min of chest compressions | 9 (37.5%) | 14 (77.8%) | 6.736 | 0.400 | **0.013** |
| Recognises ventricular fibrillation | 19 (79.2%) | 18 (100.0%) | N/A | N/A | 0.060d |
| Performs a defibrillation (shock) | 20 (83.3%) | 17 (94.4%) | N/A | N/A | 0.371d |
| Administers second dose of adrenaline after 3-5min | 8 (33.3%) | 7 (41.2%) | 0.264 | 0.080 | 0.745 |
| Minimises interruption of chest compressions | 18 (75.0%) | 4 (22.2%) | 11.486 | 0.523 | **<0.001** |
| Makes a differential diagnosis of reversible causes of cardiac arrest | 11 (45.8%) | 2 (11.1%) | 5.802 | 0.372 | **0.021** |
| Performs an arterial blood gas (ABG) to identify reversible causes (1 pt. if previously done) | 14 (58.3%) | 5 (27.8%) | 3.876 | 0.304 | 0.065 |
| Considers ultrasound imaging to identify reversible causes | 5 (20.8%) | 0 (0.0%) | N/A | N/A | 0.060d |
| Considers administration of amiodarone (after third shock) | 7 (30.4%) | 4 (22.2%) | N/A | N/A | 0.726d |
| Considers need for eCPR /ECLS (V–A ECMO) | 1 (4.2%) | 2 (11.1%) | N/A | N/A | 0.567d |
| Applies ABCDE Approach | 9 (37.5%) | 7 (38.9%) | 0.008 | 0.014 | 1.000 |
| Aims for SpO2 94–98% and normal PaCO2 | 7 (29.2%) | 7 (38.9%) | 0.438 | 0.102 | 0.742 |
| Administers vasopressors after ROSC | 10 (41.7%) | 16 (88.9%) | 9.726 | 0.481 | **0.003** |
| Seeks to perform a 12-lead ECG | 0 (0.0%) | 0 (0.0%) | N/A | N/A | N/Ad |
| Aims for targeted temperature management | 1 (4.2%) | 0 (0.0%) | N/A | N/A | 1.000d |
| States suspected diagnosis of local anaesthetics systemic toxicity | 16 (69.6%) | 18 (100.0%) | N/A | N/A | **0.012** d |
| Asks nurse to bring lipid emulsion | 13 (56.5%) | 17 (94.4%) | N/A | N/A | **0.011** d |
| Administers initial bolus of lipid emulsion in adequate dose (1.5ml/kg in 1 minute) | 4 (17.4%) | 10 (55.6%) | 6.540 | 0.399 | **0.019** |
| Initiates infusion of lipid emulsion | 1 (4.3%) | 3 (16.7%) | N/A | N/A | 0.303d |
| Verbalises need to cancel surgery | 3 (12.5%) | 2 (11.1%) | N/A | N/A | 1.000d |
| Plans ICU admission | 1 (4.2%) | 4 (22.2%) | N/A | N/A | 0.146 d |
| (a) Results are presented as absolute and relative frequencies of correctly performed measures; (b) Interpretation of association strength according to Cramér‘s *V*: 0.10≤*V*<0.30: small effect; 0.30≤*V*<0.50: medium effect; *V*≥0.50: large effect 2; (c) two-tailed *p*-value; statistically significant results are highlighted in bold; (d) Fisher’s exact test was used when the assumptions for the *χ 2* test were not met; N/A: not applicable. | | | | | |

## Table A5. Scores for individual elements of the SACSS-GRS for Scenario 1 (rater 1)

| SACSS-GRS element | Country of training | | Mann-Whitney *U* | *Z*-value | Effect size *r* b | *p*-value c |
| --- | --- | --- | --- | --- | --- | --- |
| Germany  (*n* = 24) a | Spain  (*n*= 19)  a |
| Systematic assessment approach | 4.0 (3.0–5.0) | 4.0 (3.0–5.0) | 202.000 | –0.664 | 0.101 | 0.507 |
| Physical examination | 4.0 (3.0–5.0) | 4.0 (3.0–5.0) | 207.000 | –0.535 | 0.082 | 0.593 |
| Vital signs and monitoring | 4.0 (4.0–5.0) | 4.0 (3.0–5.0) | 214.500 | –0.349 | 0.053 | 0.727 |
| Knowledge of equipment | 5.0 (4.0–5.0) | 5.0 (4.0–5.0) | 201.500 | –0.753 | 0.115 | 0.451 |
| Handling of equipment | 4.5 (4.0–5.0) | 5.0 (4.0–5.0) | 244.000 | 0.419 | 0.064 | 0.675 |
| Use of assistants | 3.0 (2.0–4.4) | 4.0 (2.0–5.0) | 260.000 | 0.802 | 0.122 | 0.423 |
| Time and motion | 4.5 (4.0–5.0) | 4.0 (3.5–5.0) | 212.000 | –0.420 | 0.064 | 0.675 |
| Therapy and medication | 4.0 (2.5–4.5) | 3.5 (2.5–4.0) | 191.000 | –0.932 | 0.142 | 0.351 |
| Guideline-based management | 4.0 (3.0–4.5) | 4.0 (3.0–4.5) | 214.500 | –0.339 | 0.052 | 0.735 |
| Overall performance | 4.0 (3.5–4.9) | 4.0 (3.5–4.5) | 218.000 | –0.249 | 0.038 | 0.804 |
| (a) Results are presented as median and interquartile range (IQR); (b) Effect size r = |Z| / √n. Interpretation according to Cohen:  *r*<0.10: negligible effect; 0.10≤*r*<0.30: small effect; 0.30≤*r*<0.50: medium effect; *r*≥0.50: large effect1; (c) two-tailed *p*-value. | | | | | | |

## Table A6. Scores for individual elements of the SACSS-GRS for Scenario 1 (rater 2)

| SACSS-GRS element | Country of training | | Mann-Whitney *U* | *Z*-value | Effect size *r* b | *p*-value c |
| --- | --- | --- | --- | --- | --- | --- |
| Germany  (*n* = 24) a | Spain  (*n*= 19)  a |
| Systematic assessment approach | 3.5 (2.3–4.0) | **4.0 (3.0–4.0)** | 284.000 | 1.544 | 0.235 | 0.123 |
| Physical examination | 4.0 (3.0–4.0) | **4.0 (3.0–4.0)** | 258.500 | 0.870 | 0.133 | 0.384 |
| Vital signs and monitoring | 4.0 (2.3–4.0) | **4.0 (3.0–5.0)** | 280.500 | 1.339 | 0.204 | 0.181 |
| Knowledge of equipment | 3.5 (2.3–5.0) | **4.0 (3.0–5.0)** | 267.500 | 1.001 | 0.153 | 0.317 |
| Handling of equipment | 3.5 (2.3–4.8) | **4.0 (3.0–4.0)** | 227.000 | –0.025 | 0.004 | 0.980 |
| Use of assistants | 4.0 (3.0–4.8) | **4.0 (3.0–4.0)** | 248.500 | 0.524 | 0.080 | 0.601 |
| Time and motion | 4.0 (2.0–4.0) | **4.0 (3.0–4.0)** | 247.500 | 0.501 | 0.076 | 0.616 |
| Therapy and medication | 4.0 (3.0–4.0) | **4.0 (4.0–5.0)** | 297.000 | 1.800 | 0.274 | 0.072 |
| Guideline-based management | 4.0 (2.0–5.0) | **4.0 (3.0–5.0)** | 270.000 | 1.068 | 1.163 | 0.286 |
| Overall performance | 3.5 (2.3–4.0) | **4.0 (3.0–4.0)** | 267.000 | 0.993 | 0.151 | 0.321 |
| (a) Results are presented as median and interquartile range (IQR); (b) Effect size r = |Z| / √n. Interpretation according to Cohen:  *r*<0.10: negligible effect; 0.10≤*r*<0.30: small effect; 0.30≤*r*<0.50: medium effect; *r*≥0.50: large effect1; (c) two-tailed *p*-value. | | | | | | |

## Table A7. Scores for individual elements of the SACSS-GRS for Scenario 2 (rater 1)

| SACSS-GRS element | Country of training | | Mann-Whitney *U* | *Z*-value | Effect size *r* b | *p*-value c |
| --- | --- | --- | --- | --- | --- | --- |
| Germany  (*n* = 24) a | Spain  (*n*= 18)  a |
| Systematic assessment approach | 4.0 (3.0–4.9) | 4.0 (3.0–4.0) | 207.000 | –0.240 | 0.037 | 0.810 |
| Physical examination | 4.0 (3.0–5.0) | 3.5 (3.0–4.1) | 175.000 | –1.067 | 0.165 | 0.286 |
| Vital signs and monitoring | 4.5 (3.0–5.0) | 4.0 (2.8–5.0) | 187.500 | –0.750 | 0.116 | 0.453 |
| Knowledge of equipment | 5.0 (4.0–5.0) | 5.0 (3.0–5.0) | 196.500 | –0.560 | 0.086 | 0.576 |
| Handling of equipment | 4.5 (3.3–5.0) | 4.5 (3.8–5.0) | 200.500 | –0.407 | 0.063 | 0.684 |
| Use of assistants | 4.0 (2.1–4.0) | 3.5 (2.9–4.1) | 212.500 | –0.092 | 0.014 | 0.927 |
| Time and motion | 4.0 (3.0–4.8) | 4.0 (3.0–4.0) | 211.500 | –0.118 | 0.018 | 0.906 |
| Therapy and medication | 4.0 (3.0–4.9) | 4.3 (3.0–5.0) | 240.000 | 0.625 | 0.096 | 0.532 |
| Guideline-based management | 4.3 (2.3–4.5) | 4.3 (2.8–4.6) | 223.000 | 0.182 | 0.028 | 0.856 |
| Overall performance | 4.5 (3.1–4.5) | 4.5 (2.9–4.5) | 226.000 | 0.270 | 0.042 | 0.787 |
| (a) Results are presented as median and interquartile range (IQR); (b) Effect size r = |Z| / √n. Interpretation according to Cohen:  *r*<0.10: negligible effect; 0.10≤*r*<0.30: small effect; 0.30≤*r*<0.50: medium effect; *r*≥0.50: large effect1; (c) two-tailed *p*-value. | | | | | | |

## Table A8. Scores for individual elements of the SACSS-GRS for Scenario 2 (rater 2)

| SACSS-GRS element | Country of training | | Mann-Whitney *U* | *Z*-value | Effect size *r* b | *p*-value c |
| --- | --- | --- | --- | --- | --- | --- |
| Germany  (*n* = 24) a | Spain  (*n*= 18)  a |
| Systematic assessment approach | 4.0 (3.0–4.0) | 4.0 (3.0–4.0) | 229.000 | 0.358 | 0.055 | 0.721 |
| Physical examination | 4.0 (3.0–4.0) | 4.0 (3.0–4.0) | 217.000 | 0.028 | 0.004 | 0.977 |
| Vital signs and monitoring | 4.0 (3.0–5.0) | 4.0 (4.0–4.0) | 250.500 | 0.929 | 0.143 | 0.353 |
| Knowledge of equipment | 4.0 (3.0–4.8) | 4.0 (3.8–4.0) | 205.000 | –0.308 | 0.048 | 0.758 |
| Handling of equipment | 4.0 (3.0–4.0) | 4.0 (3.8–5.0) | 242.500 | 0.730 | 0.113 | 0.466 |
| Use of assistants | 4.0 (3.3–4.0) | 4.0 (3.8–5.0) | 243.000 | 0.758 | 0.117 | 0.448 |
| Time and motion | 4.0 (3.0–4.0) | 4.0 (3.0–4.0) | 219.500 | 0.093 | 0.014 | 0.926 |
| Therapy and medication | 4.0 (3.0–4.0) | 4.0 (3.0–5.0) | 283.000 | 1.831 | 0.283 | 0.067 |
| Guideline-based management | 4.0 (3.0–4.8) | 4.0 (4.0–4.3) | 259.500 | 1.169 | 0.180 | 0.242 |
| Overall performance | 3.0 (3.0–4.0) | 4.0 (3.8–4.3) | 279.000 | 1.690 | 0.261 | 0.091 |
| (a) Results are presented as median and interquartile range (IQR); (b) Effect size r = |Z| / √n. Interpretation according to Cohen:  *r*<0.10: negligible effect; 0.10≤*r*<0.30: small effect; 0.30≤*r*<0.50: medium effect; *r*≥0.50: large effect1; (c) two-tailed *p*-value. | | | | | | |

## Table A9. Scores for individual elements of the ANTS for Scenario 1 (rater 1)

| ANTS category | ANTS element | Country of training | | Mann-Whitney *U* | *Z*-value | Effect size *r* b | *p*-value c |
| --- | --- | --- | --- | --- | --- | --- | --- |
| Germany  (*n* = 24) a | Spain  (*n*= 19)  a |
| Task  management | Planning and preparing | 3.5 (3.0–4.0) | 3.5 (3.0–4.0) | 218.000 | –0.259 | 0.039 | 0.796 |
| Prioritizing | 3.5 (3.0–4.0) | 3.5 (3.5–4.0) | 240.000 | 0.311 | 0.047 | 0.756 |
| Providing and maintaining standards | 3.5 (3.0–4.0) | 3.5 (3.0–3.5) | 209.000 | –0.485 | 0.074 | 0.628 |
| Identifying and utilizing resources | 3.0 (3.0–3.9) | 3.5 (3.0–3.5) | 237.000 | 0.227 | 0.035 | 0.820 |
| Team working | Coordinating activities with team members | 3.5 (3.0–4.0) | 3.5 (3.0–4.0) | 245.000 | 0.435 | 0.066 | 0.664 |
| Exchanging information | 3.5 (3.0–4.0) | 3.5 (3.0–4.0) | 206.000 | –0.560 | 0.085 | 0.575 |
| Using authority and assertiveness | 4.0 (3.1–4.0) | 4.0 (3.5–4.0) | 205.500 | –0.617 | 0.094 | 0.538 |
| Assessing capabilities | 3.5 (3.0–3.5) | 3.5 (3.0–4.0) | 244.000 | 0.407 | 0.062 | 0.684 |
| Supporting others | 3.5 (3.0–4.0) | 3.5 (3.0–3.5) | 176.000 | –1.320 | 0.201 | 0.187 |
| Situation awareness | Gathering information | 4.0 (3.5–4.0) | 3.5 (3.0–4.0) | 181.500 | –1.263 | 0.193 | 0.207 |
| Recognizing and understanding | 4.0 (3.5–4.0) | 4.0 (3.0–4.0) | 195.500 | –0.904 | 0.138 | 0.366 |
| Anticipating | 3.5 (3.0–4.0) | 3.5 (3.0–4.0) | 248.500 | 0.525 | 0.080 | 0.599 |
| Decision making | Identifying options | 3.3 (3.0–3.9) | 3.0 (2.5–3.5) | 207.000 | –0.531 | 0.081 | 0.595 |
| Balancing risks and selecting options | 3.5 (3.0–4.0) | 3.5 (3.0–4.0) | 188.000 | –1.020 | 0.156 | 0.308 |
| Re-evaluating | 3.8 (3.0–4.0) | 4.0 (3.5–4.0) | 251.000 | 0.616 | 0.094 | 0.538 |
| (a) Results are presented as median and interquartile range (IQR); (b) Effect size r = |Z| / √n. Interpretation according to Cohen:  *r*<0.10: negligible effect; 0.10≤*r*<0.30: small effect; 0.30≤*r*<0.50: medium effect; *r*≥0.50: large effect1; (c) two-tailed *p*-value. | | | | | | | |

## Table A10. Scores for individual elements of the ANTS for Scenario 1 (rater 2)

| ANTS category | ANTS element | Country of training | | Mann-Whitney *U* | *Z*-value | Effect size *r* b | *p*-value c |
| --- | --- | --- | --- | --- | --- | --- | --- |
| Germany  (*n* = 24) a | Spain  (*n*= 19)  a |
| Task  management | Planning and preparing | 4.0 (2.0–4.0) | 3.0 (3.0–4.0) | 233.500 | 0.146 | 0.022 | 0.884 |
| Prioritizing | 4.0 (2.3–4.0) | 4.0 (3.0–4.0) | 246.000 | 0.487 | 0.074 | 0.626 |
| Providing and maintaining standards | 3.0 (2.3–4.0) | 3.0 (3.0–4.0) | 261.500 | 0.896 | 0.137 | 0.370 |
| Identifying and utilizing resources | 3.5 (3.0–4.0) | 4.0 (3.0–4.0) | 240.000 | 0.321 | 0.049 | 0.748 |
| Team working | Coordinating activities with team members | 3.0 (3.0–4.0) | 3.0 (3.0–4.0) | 261.500 | 0.888 | 0.135 | 0.374 |
| Exchanging information | 3.0 (3.0–4.0) | 3.0 (3.0–4.0) | 221.000 | –0.195 | 0.030 | 0.845 |
| Using authority and assertiveness | 4.0 (2.3–4.0) | 4.0 (3.0–4.0) | 238.000 | 0.269 | 0.041 | 0.788 |
| Assessing capabilities | 3.0 (2.0–4.0) | 3.0 (3.0–4.0) | 283.500 | 1.456 | 0.222 | 0.145 |
| Supporting others | 0.0 (0.0–0.0) | 0.0 (0.0–0.0) | 212.500 | –0.752 | 0.115 | 0.452 |
| Situation awareness | Gathering information | 3.0 (3.0–4.0) | 3.0 (3.0–3.0) | 207.000 | –0.613 | 0.093 | 0.540 |
| Recognizing and understanding | 4.0 (3.0–4.0) | 4.0 (3.0–4.0) | 224.500 | –0.106 | 0.016 | 0.916 |
| Anticipating | 3.0 (2.0–4.0) | 3.0 (3.0–4.0) | 281.500 | 1.397 | 0.213 | 0.163 |
| Decision making | Identifying options | 3.0 (3.0–4.0) | 3.0 (3.0–3.0) | 211.000 | –0.471 | 0.072 | 0.638 |
| Balancing risks and selecting options | 3.0 (3.0–4.0) | 3.0 (3.0–3.0) | 209.000 | –0.562 | 0.086 | 0.574 |
| Re-evaluating | 3.0 (2.0–4.0) | 3.0 (2.0–4.0) | 257.500 | 0.758 | 0.116 | 0.449 |
| (a) Results are presented as median and interquartile range (IQR); (b) Effect size r = |Z| / √n. Interpretation according to Cohen:  *r*<0.10: negligible effect; 0.10≤*r*<0.30: small effect; 0.30≤*r*<0.50: medium effect; *r*≥0.50: large effect1; (c) two-tailed *p*-value. | | | | | | | |

## Table A11. Scores for individual elements of the ANTS for Scenario 2 (rater 1)

| ANTS category | ANTS element | Country of training | | Mann-Whitney *U* | *Z*-value | Effect size *r* b | *p*-value c |
| --- | --- | --- | --- | --- | --- | --- | --- |
| Germany  (*n* = 24) a | Spain  (*n*= 18)  a |
| Task  management | Planning and preparing | 3.5 (3.0–4.0) | 3.8 (2.9–4.0) | 249.000 | 0.874 | 0.135 | 0.382 |
| Prioritizing | 3.5 (3.0–4.0) | 3.5 (2.4–4.0) | 195.500 | –0.546 | 0.084 | 0.585 |
| Providing and maintaining standards | 3.5 (3.0–4.0) | 3.5 (2.5–4.0) | 194.000 | –0.580 | 0.089 | 0.562 |
| Identifying and utilizing resources | 3.0 (2.5–3.5) | 3.8 (3.4–4.0) | 313.000 | 2.548 | 0.393 | **0.011** |
| Team working | Coordinating activities with team members | 3.5 (3.0–4.0) | 3.5 (2.9–3.5) | 181.000 | –0.923 | 0.142 | 0.356 |
| Exchanging information | 3.5 (2.3–4.0) | 3.5 (2.9–4.0) | 224.000 | 0.212 | 0.033 | 0.832 |
| Using authority and assertiveness | 4.0 (2.3–4.0) | 3.5 (2.4–4.0) | 171.500 | –1.206 | 0.186 | 0.228 |
| Assessing capabilities | 3.5 (3.0–4.0) | 3.3 (2.4–3.6) | 185.000 | –0.812 | 0.125 | 0.417 |
| Supporting others | 3.5 (3.0–4.0) | 3.5 (3.0–4.0) | 200.000 | –0.430 | 0.066 | 0.667 |
| Situation awareness | Gathering information | 4.0 (3.0–4.0) | 3.5 (3.0–3.6) | 162.500 | –1.429 | 0.220 | 0.153 |
| Recognizing and understanding | 3.5 (3.0–4.0) | 4.0 (3.0–4.0) | 251.000 | 0.957 | 0.148 | 0.338 |
| Anticipating | 3.5 (3.0–3.5) | 3.5 (2.9–4.0) | 217.500 | 0.040 | 0.006 | 0.968 |
| Decision making | Identifying options | 3.5 (3.0–3.5) | 3.5 (2.9–4.0) | 244.000 | 0.746 | 0.115 | 0.456 |
| Balancing risks and selecting options | 3.5 (3.0–4.0) | 3.3 (2.4–3.6) | 178.500 | –0.982 | 0.152 | 0.326 |
| Re-evaluating | 4.0 (3.1–4.0) | 3.5 (3.0–4.0) | 182.500 | –0.936 | 0.144 | 0.349 |
| (a) Results are presented as median and interquartile range (IQR); (b) Effect size r = |Z| / √n. Interpretation according to Cohen:  *r*<0.10: negligible effect; 0.10≤*r*<0.30: small effect; 0.30≤*r*<0.50: medium effect; *r*≥0.50: large effect1; (c) two-tailed *p*-value. | | | | | | | |

## Table A12. Scores for individual elements of the ANTS for Scenario 2 (rater 2)

| ANTS category | ANTS element | Country of training | | Mann-Whitney *U* | *Z*-value | Effect size *r* b | *p*-value c |
| --- | --- | --- | --- | --- | --- | --- | --- |
| Germany  (*n* = 24) a | Spain  (*n*= 18)  a |
| Task  management | Planning and preparing | 4.0 (3.0–4.0) | 4.0 (3.0–4.0) | 243.500 | 0.806 | 0.124 | 0.420 |
| Prioritizing | 4.0 (3.0–4.0) | 4.0 (3.0–4.0) | 209.000 | –0.202 | 0.031 | 0.840 |
| Providing and maintaining standards | 3.0 (3.0–4.0) | 3.5 (3.0–4.0) | 232.000 | 0.451 | 0.070 | 0.652 |
| Identifying and utilizing resources | 3.0 (2.3–3.8) | 4.0 (3.0–4.0) | 324.000 | 2.993 | 0.462 | **0.003** |
| Team working | Coordinating activities with team members | 3.5 (3.0–4.0) | 4.0 (3.0–4.0) | 252.000 | 1.044 | 0.161 | 0.296 |
| Exchanging information | 3.0 (3.0–4.0) | 4.0 (3.0–4.0) | 273.000 | 1.657 | 0.256 | 0.097 |
| Using authority and assertiveness | 3.5 (2.3–4.0) | 4.0 (3.0–4.0) | 262.500 | 1.342 | 0.207 | 0.180 |
| Assessing capabilities | 3.0 (3.0–4.0) | 4.0 (3.0–4.0) | 269.500 | 1.470 | 0.227 | 0.142 |
| Supporting others | 0.0 (0.0–3.0) | 3.0 (0.0–3.0) | 281.000 | 1.835 | 0.283 | 0.066 |
| Situation awareness | Gathering information | 3.0 (3.0–3.0) | 3.0 (3.0–4.0) | 249.000 | 1.067 | 0.165 | 0.286 |
| Recognizing and understanding | 3.0 (2.0–4.0) | 4.0 (3.0–4.0) | 307.500 | 2.499 | 0.386 | **0.012** |
| Anticipating | 3.0 (2.3–4.0) | 4.0 (3.0–4.0) | 263.000 | 1.302 | 0.201 | 0.193 |
| Decision making | Identifying options | 3.0 (3.0–3.9) | 3.0 (3.0–4.0) | 252.000 | 0.997 | 0.154 | 0.319 |
| Balancing risks and selecting options | 3.0 (3.0–3.9) | 3.0 (3.0–4.0) | 268.000 | 1.472 | 0.227 | 0.141 |
| Re-evaluating | 3.0 (2.0–4.0) | 4.0 (2.8–4.0) | 250.000 | 0.929 | 0.143 | 0.353 |
| (a) Results are presented as median and interquartile range (IQR); (b) Effect size r = |Z| / √n. Interpretation according to Cohen: *r*<0.10: negligible effect; 0.10≤*r*<0.30: small effect; 0.30≤*r*<0.50: medium effect; *r*≥0.50: large effect1; (c) two-tailed *p*-value. | | | | | | | |

## Table A13. General assessment of simulation for scenario 1

| Questionnaire item | Strongly disagree | Disagree | neutral | Agree | Strongly agree |
| --- | --- | --- | --- | --- | --- |
| The room used was appropriate to represent the simulated scenario | 0 | 0 | 0 | 11 (25.6%) | 32 (74.4%) |
| The equipment present in the room was appropriate to represent the simulated scenario | 0 | 1 (2.3%) | 0 | 15 (34.9%) | 27 (62.8%) |
| The mannequin used in the scenario was appropriate to represent the simulated patient | 1 (2.3%) | 0 | 4 (9.3%) | 16 (37.2%) | 22 (51.2%) |
| The monitors displaying the vital parameters of the patient were disposed in a similar way as in real situations at my workplace | 0 | 0 | 5 (11.6%) | 13 (30.2%) | 25 (58.1%) |
| The performance of the actors was realistic and consistent enough with the equivalent roles in real life | 0 | 0 | 0 | 7 (16.3%) | 36 (83.7%) |
| The progress of the scenario made the clinical deterioration of the patient recognisable | 0 | 0 | 0 | 12 (27.9%) | 31 (72.1%) |
| Overall, the realism of the situation was sufficient to make me engage in the scenario | 0 | 1 (2.3%) | 2 (4.7%) | 6 (14.0%) | 34 (79.1%) |
| Responses are shown as the number and percentage of participants selecting each option on a five-point Likert scale | | | | | |

## Table A14. Assessment simulation scenario 1 by country of training

| Questionnaire item | Country of training | | Mann-Whitney-*U* (*Z*-value) | Effect size *r* a | *p*-value b |
| --- | --- | --- | --- | --- | --- |
| Germany  (*n* = 24 ) | Spain  (*n* = 19) |
| “The room used was appropriate to realistically represent the simulated scenario.” | 5.0 (4.3–5.0) | 5.0 (4.0–5.0) | 225.000 (–0.097) | 0.015 | 0.923 |
| “The equipment available in the room was appropriate to realistically represent the simulated scenario.” | 4.0 (4.0–5.0) | 5.0 (5.0–5.0) | 338.000 (3.192) | 0.487 | 0.001 |
| “The simulation manikin used in the scenario was appropriate to represent a real patient.” | 4.0 (4.0–5.0) | 5.0 (4.0–5.0) | 308.500 (2.170) | 0.331 | 0.030 |
| “The monitors displaying vital signs were arranged similarly to real clinical situations in my workplace.” | 5.0 (4.0–5.0) | 4.0 (4.0–5.0) | 182.000 (–1.278) | 0.195 | 0.201 |
| “The performance of the confederates was realistic and consistent with their roles in clinical practice.” | 5.0 (5.0–5.0) | 5.0 (5.0–5.0) | 242.000 (0.507) | 0.077 | 0.612 |
| “The progression of the scenario clearly reflected the patient’s clinical deterioration.” | 5.0 (4.0–5.0) | 5.0 (5.0–5.0) | 256.000 (0.881) | 0.134 | 0.378 |
| “Overall, the situation was sufficiently realistic for me to engage with the scenario.” | 5.0 (4.0–5.0) | 5.0 (5.0–5.0) | 240.500 (0.414) | 0.063 | 0.679 |
| Average of all scorings. | 4.7 (4.5–4.7) | 4.7 (4.4–5.0) | 279.000 (1.270) | 0.194 | 0.204 |
| Data are presented as median (IQR); (a) Effect size r = |Z| / √n. Interpretation of effect size according to Cohen: *r*<0.10: negligible effect; 0.10≤*r*<0.30: small effect; 0.30≤*r*<0.50: medium effect; *r*≥0.50: large effect 1; (b) two-tailed *p* value; statistically significant results (*p*<0.05) are highlighted in bold. | | | | | |

## Table A15. General assessment of simulation for scenario 2

| Questionnaire item | Strongly disagree | Disagree | neutral | Agree | Strongly agree |
| --- | --- | --- | --- | --- | --- |
| The room used was appropriate to represent the simulated scenario | 0 | 0 | 0 | 9 (20.9%) | 34 (79.1%) |
| The equipment present in the room was appropriate to represent the simulated scenario | 0 | 0 | 0 | 14 (32.6%) | 29 (67.4%) |
| The mannequin used in the scenario was appropriate to represent the simulated patient | 0 | 0 | 4 (9.3%) | 14 (32.6%) | 25 (58.1%) |
| The monitors displaying the vital parameters of the patient were disposed in a similar way as in real situations at my workplace | 0 | 0 | 4 (9.3%) | 8 (18.6%) | 31 (72.1%) |
| The performance of the actors was realistic and consistent enough with the equivalent roles in real life | 0 | 0 | 0 | 7 (16.3%) | 36 (83.7%) |
| The progress of the scenario made the clinical deterioration of the patient recognisable | 0 | 0 | 0 | 9 (20.9%) | 34 (79.1%) |
| Overall, the realism of the situation was sufficient to make me engage in the scenario | 0 | 0 | 2 (4.7%) | 8 (18.6%) | 33 (76.7%) |
| Responses are shown as the number and percentage of participants selecting each option on a five-point Likert scale | | | | | | |

## Table A16. Assessment simulation scenario 2 by country of training

| Questionnaire item | Country of training | | Mann-Whitney-*U* (*Z*-value) | Effect size *r* a | *p*-value b |
| --- | --- | --- | --- | --- | --- |
| Germany  (*n* = 24 ) | Spain  (*n* = 19) |
| “The room used was appropriate to realistically represent the simulated scenario.” | 5.0 (4.0–5.0) | 5.0 (5.0–5.0) | 270.500 (1.475) | 0.225 | 0.140 |
| “The equipment available in the room was appropriate to realistically represent the simulated scenario.” | 5.0 (4.0–5.0) | 5.0 (5.0–5.0) | 296.500 (2.063) | 0.315 | **0.039** |
| “The simulation manikin used in the scenario was appropriate to represent a real patient.” | 4.0 (4.0–5.0) | 5.0 (5.0–5.0) | 335.000 (2.972) | 0.453 | **0.003** |
| “The monitors displaying vital signs were arranged similarly to real clinical situations in my workplace.” | 5.0 (4.0–5.0) | 5.0 (4.0–5.0) | 232.500 (0.140) | 0.021 | 0.889 |
| “The performance of the confederates was realistic and consistent with their roles in clinical practice.” | 5.0 (4.3–5.0) | 5.0 (5.0–5.0) | 273.000 (1.721) | 0.262 | 0.085 |
| “The progression of the scenario clearly reflected the patient’s clinical deterioration.” | 5.0 (4.0–5.0) | 5.0 (5.0–5.0) | 270.500 (1.475) | 0.225 | 0.140 |
| “Overall, the situation was sufficiently realistic for me to engage with the scenario.” | 5.0 (4.0–5.0) | 5.0 (5.0–5.0) | 248.000 (0.641) | 0.098 | 0.521 |
| Average of all scorings. | 4.7 (4.4–4.9) | 5.0 (4.7–5.0) | 330.500 (2.561) | 0.391 | **0.010** |
| Data are presented as median (IQR); (a) Effect size r = |Z| / √n. Interpretation of effect size according to Cohen: *r*<0.10: negligible effect; 0.10≤*r*<0.30: small effect; 0.30≤*r*<0.50: medium effect; *r*≥0.50: large effect 1; (b) two-tailed *p* value; statistically significant results (*p*<0.05) are highlighted in bold. | | | | | |

# References

1. Cohen J. A power primer. Psychol Bull. 1992;112(1):155–9. doi:10.1037/0033-2909.112.1.155

2. Cohen J. Statistical Power Analysis for the Behavioral Sciences. 2nd ed. Hoboken: Taylor and Francis; 1988. 567 p.
