# Supplementary material
Source: Research Square preprint supplement (doi:10.21203/rs.3.rs-9581391/v1)
Supplement: Supplementary file 5 [file 8eddff54a70004e0f77da94f.docx]

**ADDITIONAL FILE 4**

**Scenario scripts**

Gerard S. Angeles-Fite1,2,3,4,*, Sara García-Ballester5, Federico Migliorelli6,7, Lidia Gómez-López4,8, Beatriz Tena2,4,8, Marina Vendrell2,4,8, Manuel López‐Baamonde4,7,8, Juan M. Perdomo2,4,8, Cristina Ibañez4,8, Raquel Bergé4,8, Tomás Cuñat4,8, Johannes Schäfer1,3, Albert Carramiñana4,8, Miriam F. Panzeri4,8, Ricard Valero2,7,8,9,† and Christopher Neuhaus1,3,†

1Medical Faculty Heidelberg, Department of Anesthesiology, Heidelberg University, Heidelberg, Germany.

2Departament de Cirurgia i Especialitats Medicoquirúrgiques, Facultat de Medicina i Ciències de la Salut, Universitat de Barcelona (UB), Barcelona, Spain.

3Heidelberg Anaesthesia and Emergency Simulation Centre (HANS), Heidelberg University Hospital, Heidelberg, Germany.

4Anaesthesiology Clinical Simulation Group (SIMCLÍNIC), *Hospital Clínic de Barcelona*, Barcelona, Spain.

5Department of Anaesthesiology and Critical Care, Bellvitge University Hospital, University of Barcelona, Hospitalet de Llobregat, Barcelona, Spain.

6BCNatal - Barcelona Center for Maternal-Fetal and Neonatal Medicine (*Hospital Clínic* *and Hospital Sant Joan de Déu*), *Institut Clínic de Ginecologia, Obstetrícia i Neonatologia*, Fetal i+D Fetal Medicine Research Center, Barcelona, Spain.

7Institut d’Investigacions Biomèdiques August Pi i Sunyer (IDIBAPS), Barcelona, Spain.

8Department of Anaesthesiology and Critical Care, *Hospital Clínic de Barcelona*, Barcelona, Spain.

9*Centro de Investigación Biomédica en Red de Salud Mental* (CIBERSAM), *Instituto de Salud Carlos III* (ISCIII), Spain

*Correspondence to: Gerard Sergi Angeles Fite, Department of Anaesthesiology and Intensive Care, Bürgerspital Solothurn, Schöngrünstrasse 42, 4500 Solothurn, Switzerland; Tel: +41326274041; E-mail: gerardsergi.angeles@gmail.com

†Contributed equally to this work

**Table of contents**

[Script for Scenario 1 3](#_Toc227337203)

[Script for Scenario 2 15](#_Toc227337204)

## Script for Scenario 1

**ATSA-Study**

Anaesthesiology Trainees Simulation-based Assessment - Study

Scenario script 1

|  | **Participants involved in the scenario:** | | | |
| --- | --- | --- | --- | --- |
| **Function** | Test subject:  anaesthesia trainee | Actor 1:  anaesthetic nurse | Actor 2:  scrub nurse | Actor 3:  consultant anaesthetist |
| **Number** | 1 | 1 | 1 | 1 |

|  | **Additional personnel:** | |
| --- | --- | --- |
| **Function** | Technician | Debriefer |
| **Number** | 1 | 1 |

**General information about the scenario**

| **Title:** Unexpected difficult airway due to anaphylaxis with angioedema |
| --- |

| **Brief summary of the scenario** |
| --- |
| The scenario takes place during day time shift, in an operating room of a university hospital. The patient is a 52-year-old man scheduled for radical prostatectomy due to prostate cancer.  The participant is instructed to initiate general anaesthesia for the procedure. Following induction, the patient experiences an anaphylactic reaction with angioedema and upper airway obstruction. The situation escalates into a “cannot intubate, cannot oxygenate” (CICO) emergency. The scenario ends following the performance of a cricothyrotomy and successful ventilation of the patient. |

| **ETR-defined competencies addressed in this scenario** | | |
| --- | --- | --- |
| **Domain** | **Competency (clinical skills and specific attitudes)** | **Level1** |
| Perioperative medicine, patient assessment and risk reduction | - Patient assessment based on history and physical examination [...]  - Assessment of the airway  - Selection and planning of the individual anaesthesia technique [...], difficult airway management [...]  - Decision-making relating to postponement or cancellation of surgery | D  D  D  D |
| General anaesthesia and sedation | - Preparation of the workplace according relevant checklists and environmental safety measures  - Providing safe inhalation and intravenous induction, maintenance of, and emergence from general anaesthesia, including the choice of drugs, airway management, ventilation technique and intraoperative adverse event management  - Appropriate use of medical and technical equipment  - Regular use of recommended checklists and guidelines  - Diagnosis and management of intraoperative critical incidents including:  allergic reactions, anaphylaxis  [...] inadequate airway  hypoxia, hypercarbia [...] | D  D  D  D  D |
| Airway management | - Establishment and maintenance of an adequate airway in patients with anticipated and un- anticipated difficult airway [...] including the use of different devices and techniques according to existing algorithms  - Appropriate selection and use of different airway devices (e.g. videolaryngoscopes, fiberoptic laryngoscopes, laryngeal mask)  - Cricothyroidotomy (e.g. in medical simulation training)  - Recognition and treatment of complications early and late, including dislodgement | D  D  D  D |
| Postoperative care and acute pain management | - Use of discharge and transfer criteria to ICU  - Informing the patient of any untoward incidents (e.g. difficult airway...) and offering advice and written information on future anaesthesia | D  D |
| Intensive care medicine | - Airway management including intubation under emergency situations  - Performing patient assessment and physical examination [...]  - Effectively communicate with other health care providers  - Team work together with other health care professionals to ensure smooth patient care and safety  - Vigilance and situational awareness | D  D  D  D  D |
| Critical emergency medicine | - Management of life-threatening medical and surgical emergency conditions | D |
| Anaesthesia Non-Technical Skills (ANTS) | - Task management;  Planning and preparing  Prioritizing  Providing and maintaining standards  Identifying and utilizing resources  - Team working:  Coordinating activities with team members  Exchanging information  Using authority and assertiveness  Assessing capabilities  Supporting others  - Situation Awareness:  Gathering information  Recognizing and understanding  Anticipating  - Decision making:  Identifying options [...]  Balancing risks and selecting options  Re-evaluating | D  D  D  D  D  D  D  D  D  D  D  D  D  D  D |
| Patient safety and health economics | - Use of checklists and guidelines  - Commitment to critical incidents reporting | D  D |
| (1): Level of competencies: 'A: observer level (has knowledge of, describes)'; 'B: performs, manages, demonstrates under direct supervision'; 'C: performs, manages, demonstrates under distant supervision'; 'D: performs, manages, demonstrates independently | | |

**Information for the participant**

| **Case briefing for the participant** |
| --- |
| The scenario takes place during a morning shift in an operating theatre at a university hospital.  The patient is a 52-year-old man, admitted for an elective prostatectomy due to prostate carcinoma.  -----------------------------------------------------------------------------------------------------------------------------  Details from the Anaesthesia Record:  The patient is a 52-year-old man, 175 cm tall, weighing 90 kg (BMI 29).  Planned operation: radical prostatectomy  **Allergies:** Suspected penicillin allergy (based on history: an allergic reaction occurred during general anaesthesia 20 years ago, no allergy testing was performed).  **Smoking history:** Former smoker with a history of 2.5 pack-years.  **Alcohol consumption:** Occasional.  Past medical history: Allergic asthma. History of appendectomy 20 years ago. Tonsillectomy in childhood.  Regular medication: Salbutamol 0.1mg up to twice daily as needed. Cetirizine 10mg once daily as needed.  Airway assessment: No signs of a difficult airway. Mouth opening 4–5 cm. Mallampati class II. Jaw protrusion >0º; upper lip bite test grade I (skin of upper lip is bitten). Thyromental distance >6.5 cm. Cervical spine range of motion (flexion to extension) >100°. Neck circumference 42 cm. No dentures. No known obstructive sleep apnoea (OSA).  Lab results: within normal limits.  Preoperative ECG: no abnormalities  Anaesthesia consent form: signed.  Premedication: Midazolam 7,5mg p.o., on the ward.  -----------------------------------------------------------------------------------------------------------------------------  The anaesthetic nurse is waiting for you to begin induction of anaesthesia. |

**Information for instructors**

| **Detailed description of the scenario** |
| --- |
| The scenario takes place during a day time shift, in an operating theatre of a university hospital. On the operating table lies a 52-year-old patient scheduled to undergo radical prostatectomy for prostate cancer. The participants are instructed to conduct a general anaesthesia for the surgery.  **Shortly before the starting situation:**  The patient was transferred from the holding area into the operating theatre by the anaesthetic nurse. He is now lying on the operating table, covered with a blanket. Standard monitoring is in place.  The consultant briefly enters and asks where the anaesthesiology trainee is, noting with urgency that the operation must begin on time.  Due to the patient's pronounced anxiety, the consultant instructed the anaesthesia nurse to administer 1 mg of intravenous midazolam and to begin preoxygenation using a face mask. The consultant then states that he will look for the responsible trainee and leaves the room.  (The participant is briefed outside the door).  **Initial Situation (as the participant enters):**  The patient appears calm and slightly drowsy. The anaesthesia nurse is holding a face mask over the patient’s mouth and nose and instructing him to take deep breaths (preoxygenation). Standard monitoring is connected: SpO₂, non-invasive blood pressure (NIBP), and ECG. An 18G peripheral venous catheter is inserted on the back of the left hand, and an infusion is running.  As soon as the anaesthesiology trainee enters, the anaesthesia nurse introduces them to the patient: “This is our anaesthetist.” The nurse then tells the trainee that the patient had been very anxious earlier, which is why—on the consultant's instructions—1 mg of midazolam was intravenously given. He/she also mentions that the consultant requested the induction be carried out quickly, and that propofol, sufentanil, rocuronium, and ephedrine have already been prepared, as well as an 8.0 endotracheal tube and a 4.0 Macintosh blade.  The anaesthesia nurse gives up the position at the head of the patient to the participant and moves to the left side. He then asks for the dosages of the medications for induction.  **Progression of the Scenario (see table for vital parameters):**  Following induction, the patient develops an allergic reaction with angioedema.  Initial manual ventilation (first minute post-induction) is unproblematic, with the patient showing mild hypotension.  As soon as the resident removes the mask (for the first intubation attempt or to insert an oropharyngeal airway), the anaesthesia nurse expresses alarm that the patient's tongue and lips are severely swollen.  From minute 2 to minute 4, bag-valve-mask ventilation becomes increasingly difficult (though still possible), with signs of mask leakage, insufficient chest rise, and flat capnography waveform, which the anaesthesia nurse points out. SpO₂ levels slowly decline, from 96% to 92%.  If used, the oropharyngeal (or nasopharyngeal) airway initially facilitates bag-valve-mask ventilation. The first laryngoscopy attempt shows a Cormack-Lehane Grade IV view. In further attempts of bag-valve-mask ventilation with oropharyngeal (Guedel) or nasopharyngeal (Wendl) airways, ventilation of the patient is possible.  If performed, the insertion of a laryngeal mask improves manual ventilation slightly but is associated with significant leakage.  During this phase, the anaesthesia nurse repeatedly verbalises that the capnography waveform is "flattened", a leakage is audible, and the chest rise is inadequate.  If requested, videolaryngoscope, fibro-bronchoscope and difficult airway trolley are not in the induction room and must be retrieved by one of the actors from the control room.  The anaesthesia consultant is reachable via his/her on-call number, but will be busy in another anaesthetic room, assisting the intubation on patient with known difficult airway, and won't enter the scenario until minute 5). If called, he/she will instruct to attempt bag-valve-mask ventilation and perform a second intubation attempt with the videolaryngoscope, and state that he will arrive as soon as possible.  From minute 4 onwards, manual ventilation becomes impossible. It is a “cannot intubate, cannot ventilate” (CICO) situation.  All further airway interventions—including laryngeal mask or intubation attempts—are unsuccessful. SpO₂ begins to fall dramatically.  **End of the scenario:**  The scenario concludes with a cricothyrotomy and successful ventilation via a cricothyrotomy cannula or tube. This can be either performed by the trainee, or the consultant.  The patient does not go into cardiac arrest during the scenario. Securing the airway through cricothyrotomy prevents this outcome. |

| **Limitations of the scenario** |
| --- |
| - Manual ventilation of the mannequin is possible but not 100% realistic. Capnography during manual ventilation does not display a clear waveform (capnogram).  - The mannequin’s skin and mucous membranes do not become oedematous and cannot change colour (cyanosis / pallor). Such physical findings must be verbalised by the actors.  - Swelling of the tongue and upper airway obstruction is difficult to simulate and must be verbalised and repeated by the actors.  - Even with correct settings, it is always possible to intubate the manikin “by force”. To ensure the intended course of action, important information may need to be verbalised by the actors.  - It is difficult to simulate a challenging airway situation for intubation with a video laryngoscope or fiber bronchoscope using the hardware of a training manikin. Instead of using the images generated by these devices during the simulation, pre-printed images of the desired video-laryngoscopic or fiber-bronchoscopic view are used. For the video laryngoscope simulation, a Cormack-Lehane IV image is used, and for the fiber bronchoscope simulation, a photograph of an edematous glottis is used. |

| **Setting and controlling vital signs** | | | | | |
| --- | --- | --- | --- | --- | --- |
| **Time** | **Comments** | **SpO2 (%)** | **EtCO2 (kPa)** | **HR (beats/min)** | **NIBP (mmHg)** |
| Before inductions |  | 100 | - | 68 | 125/60 |
| At induction (0 s) |  | 100 | - | 85 | 145/80 |
| 30 s |  | 100 | 4.1 | 59 | 105/55 |
| 45 s | Bag-valve-mask ventilation normal | 100 | 4.6 | 58 | 100/45 |
| 1 min | Bag-valve-mask ventilation normal  Intubation not possible: tongue swollen / Cormack-Lehane Grade IV | 99 | 2.6 | 55 | 95/50 |
| 1 min 30 s | 99 | 2.0 | 55 | 70/40 |
| 2 min | Manual ventilation becomes difficult: mask/mouth corner leakage, inadequate chest excursion | 96 | 1.6 | 65 | 70/40 |
| 2 min 30 s | 95 | 1.3 | 70 | 70/40 |
| 3 min | 93 | 0.7 | 80 | 70/40 |
| 3 min 30 s | 92 | 0.39 | 95 | 70/40 |
| 4 min | Manual ventilation impossible: “cannot intubate, cannot oxygenate” | 85 | No capnogram, no capnometry value | 110 | 85/45 |
| 4 min 30 s | 75 | 120 | 90/40 |
| 5 min | 65 | 130 | 90/40 |
| 5 min 30 s | 55 | 140 | 90/40 |
| 6 min | 45 | 150 | 90/40 |
| 6 min 30 s | 35 | 155 | 90/40 |
| 7 min | 25 | 150 | 90/40 |
| 7 min 30 s | 15 | 130 | 90/40 |
| 8 min | 5 | 130 | 90/40 |
| 8 min 30 s | 5 | 120 | 90/40 |
| *Any time* | If ephedrine is administered | *-* | *-* | *-* | *↑15%* |
| *Any time* | If norepinephrine is administered | *-* | *-* | *-* | *↑↑30-50%* |
| *Any time* | If epinephrine is administered | *-* | *-* | *↑↑↑ 50-100%* | *↑↑↑ 50-100%* |
| *Any time* | If 500 ml fluids i.v. are infused | *-* | *-* | *↓25%* | *↑↑ 50%* |
| *Any time* | If cricothyrotomy is performed | *↑ 100%* | *6.0–6.7* | *110* | *100/50* |

| **Specific instructions for actor 1: anaesthetic nurse** |
| --- |
| The scenario takes place during a morning shift in an operating theatre at a university hospital.  The patient is a 52-year-old man scheduled for a radical prostatectomy due to prostate cancer.  You are an experienced anaesthetic nurse who is familiar with the clinic and your working environment.  You have brought the patient into the operating theatre, attached the pulse oximeter, blood pressure cuff and electrodes to the patient and connected to the monitor.  The consultant anaesthetist came in and appeared disappointed to find that the trainee was not yet there. Concerned about the delay, he asked you to begin preoxygenation using the face mask. As the patient was slightly anxious, he also instructed you to administer 1 mg of midazolam intravenously before leaving the room to look for the trainee.  The participant will be briefed behind the door and instructed to begin the general anaesthesia with you. As soon as they arrive, you introduce them to the patient by saying: **“This is our anaesthetist.”**  You have prepared propofol, sufentanil, rocuronium, and ephedrine, as well as an 8.0 endotracheal tube and a size 4.0 Macintosh laryngoscope blade.  You hand over the position at the head of the bed to the participant and move to the patient’s left side (where the i.v. access is). Then you ask for the drug dosages before administering them.  Following induction of anaesthesia, an allergic reaction with angioedema will occur. Throughout the entire scenario, you must supplement certain physical findings and help guide the scenario towards the intended direction: a “cannot intubate, cannot ventilate” situation.  First minute after induction:  Immediately after induction, the patient can be ventilated effectively, and the SpO₂ remains stable. **Note:** The mannequin is not as easy to ventilate as a real patient. If the participant expresses doubt during this phase, you should verbalise that the SpO₂ is good, the chest is rising, and the anaesthesia machine is displaying a capnography waveform.  If the trainee requests an oropharyngeal airway (Guedel tube) immediately after induction and before laryngoscopy, you should not say anything at that point (as the swelling of the tongue and lips takes time to develop). However, if the request comes around one minute after induction but still before laryngoscopy, you should then state that the tongue and lips appear swollen.  Between 1 and 2 minutes after induction, most trainees will attempt intubation. As soon as the face mask is removed, you should react with alarm and say that "the lips and tongue are very swollen".  A laryngoscopy can be performed by the trainee, but make sure to verbalise that it should be performed gently. At this point, several settings designed to prevent intubation will have been activated in the mannequin (“Swollen tongue” and “Airway occluder”). Nevertheless, the mannequin can still be intubated if excessive force is used. It must be ensured that the mannequin is not damaged by excessive force! You should try to prevent this: if the trainee requests the endotracheal tube to attempt intubation, you should say that neither the glottis, nor the epiglottis are visible during laryngoscopy (Cormack-Lehane grade IV).  Caution: If trainee still attempts and performs endotracheal intubation despite your warnings, you will have to rescue the scenario by stating that no vesicular breath sounds are heard on auscultation and that no capnography waveform is visible on the anaesthesia machine monitor.  At this point, a oropharyngeal airway (Guedel tube) can still be inserted into the mannequin. The nasopharyngeal airway (Wendl) does not fit into the nasal passage. In this case you should simulate the placement as if it were being inserted.  Between 2 and 4 minutes after induction: "CANNOT INTUBATE"  Between 2 and 4 minutes after induction, ventilation using all airway adjuncts (mask, Wendl/Guedel airway, LMA) is still possible but unsatisfactory. You should repeatedly state that the mask is not sealing completely, an air leak is audible, the chest is not fully rising, and the ventilator is showing a capnography waveform (EtCO₂) with a very low-amplitude curve.  If the participant does not respond to the increasing difficulty of manual ventilation and the desaturation, you should express concernverbally and should actively offer suggestions (e.g. using a nasopharyngeal / oropharyngeal airway or performing a two-person mask seal).  If the trainee requests the videolaryngoscope, it must be fetched from the control room (the theatre nurse can assist with this). The video-laryngoscope blade may be inserted into the patient’s mouth as usual. However, the screen must remain turned off. Instead of a live view from the tip-mounted camera, a photograph depicting a Cormack-Lehane grade IV view should be shown.  If the trainee requests the fiber-bronchoscope, it must be also fetched from the control room. Again, the monitor should remain switched off. Instead of displaying a live view, a photograph depicting a severely swollen and fully occluded glottis should be shown.  If an LMA is inserted, the situation will change very little. There will still be an air leak, minimal chest excursion, and a flat capnography waveform.  During this phase, the trainee may call the consultant anaesthetist. The latter will be performing a difficult intubation, and won't be able to come at this point.  From 4 minutes after induction onwards: "CANNOT INTUBATE, CANNOT OXYGENATE"  From minute 4 onwards, the situation will deteriorate dramatically. The patient can no longer be ventilated: there is a loud air leak, no chest excursion, and no capnography waveform. From this point, the SpO₂ will drop below 92%.  Any further attempts at ventilation will be ineffective, and the situation will continue to worsen.  If the trainee has not yet called the consultant anaesthetist, you may suggest doing so. This time, the consultant will arrive (no earlier than 5 minutes and no later than 7 minutes after induction).  If not already done, you can also suggest retrieving the difficult airway trolley, which is located in the control room.  The situation must be resolved by performing a **cricothyrotomy**. This should be performed on the mannequin. The cricothyrotomy set is located in the difficult airway trolley.  If the trainee decides to perform this, before the consultant arrives, you will assist him. Otherwise, if hesitant or unwilling, the consultant will take over and resolve the situation. |

| **Specific instructions for actor 2: scrub nurse** |
| --- |
| The scenario takes place during a morning shift in an operating theatre at a university hospital. The patient is a 52-year-old man scheduled for a radical prostatectomy due to prostate cancer.  You are an experienced operating theatre nurse, mainly working as a scrub nurse but occasionally assisting as an anaesthetic nurse. You are familiar with the clinic and your working environment. You are nearly finished preparing the equipment for surgery.  To ensure the operation starts on time, the anaesthetic induction will take place in the operating theatre. The anaesthetic nurse and the anaesthetist will begin the induction.  Following induction, anaesthetic complications will occur. You should remain ready to assist both the anaesthetist and the anaesthetic nurse.  You may be asked to carry out tasks, such as retrieving the videolaryngoscope or the difficult airway trolley. |

| **Specific instructions for actor 3: consultant anaesthetist** |
| --- |
| The scenario takes place during a morning shift in an operating theatre at a university hospital. The patient is a 52-year-old man scheduled for a radical prostatectomy due to prostate cancer.  You are the regular consultant in charge of the area, responsible for four theatres. Today’s list is busy, and it’s important that surgery begins on time. As usual, the first case of the day will be induced directly in the operating theatre.  The patient was transferred and positioned in the theatre by the anaesthetic nurse. After being connected to the monitor, you briefly entered the room to check whether the trainee had arrived, but they were not yet present.  As the patient appeared quite anxious, you instructed the anaesthetic nurse to administer 1 mg of Midazolam IV and begin preoxygenation using the face mask. You then left the room, phoned the trainee, and told them to hurry, and headed to the next operating room.  After a briefing, the trainee will enter the simulation and begin with induction of anaesthesia. After induction, an allergic reaction with angioedema and unexpected difficult airway will occur.  While you are in another theatre supervising a junior trainee during an induction on a patient with a known difficult airway, the participant calls you. They report that they have induced the patient but are unable to intubate conventionally due to tongue swelling. You ask over the phone whether the patient is still ventilatable and are told that ventilation is difficult but still possible. You then ask whether the patient is adequately anaesthetised and relaxed, and recommend fetching the difficult airway trolley and videolaryngoscope. You tell them you will head over as soon as possible.  (For the moment, you should give the trainee some time, and wait until 5 minutes after induction, before you enter the simulation room).  When the second call from the participant comes in, the situation has changed. The trainee was unable to intubate using the videolaryngoscope, and the patient can no longer be ventilated. A **"cannot intubate, cannot oxygenate"** situation has developed. You rush to the scene to manage the situation.  In the scenario, if the trainee has indicated the cricothyrotomy, you assist him. Otherwise, you take the lead and attempt a new videolaryngoscopy (Cormack-Lehane grade IV) before indicating and performing a cricothyrotomy.  The scenario ends after the cricothyrotomy and successful ventilation of the patient. |

**Organisational aspects / preparation**

| **Required Equipment** |
| --- |
| - Simulation mannequin  - Standard anaesthesia monitor  - Standard anaesthesia machine  - Anaesthesia trolley  - Self-inflating bag with reservoir  - Suction unit connected to a vacuum source  - Difficult airway trolley  - Videolaryngoscope (at least blade + screen photo)  - Fibrobronchoscope (+ screen photo)  - Operating table  - Boxes with simulated surgical tools  - Surgical side table (instrument table)  - Video-/audio recording system |

| **Consumables** |
| --- |
| - Surgical cap and face mask  - Patient gown  - Blanket  - Peripheral venous catheter (PVC) + 3-way stopcock  - Suction catheters + collection bag (for drainage of infusions/medications)  - Sodium chloride 0.9% (100 ml)  - Standard crystalloid 500 ml × 2  - Green surgical drapes  - Boxes containing standard surgical materials  - Color-coded syringes for anaesthesia medications:  Hypnotics: Propofol, Midazolam, Etomidate, Thiopental, Ketamine. Opioids: Sufentanil / Fentanyl / Remifentanil / Piritramide. Muscle relaxants: Rocuronium, Cisatracurium, Atracurium, Mivacurium. Vasoactive drugs: Norepinephrine/ Epinephrine. Antiarrhythmics: Lidocaine, Amiodarone, Metoprolol. Antihypertensives: Urapidil, Labetalol, Nitroglycerine. Antiemetics: Granisetron, Dimenhydrinate, Dexamethasone, Droperidol.  - Airway equipment (Anaesthesia trolley):  - 3 face masks  - 3nasopharyngeal/oropharyngeal airways (Wendl / Guedel)  - 3 laryngeal masks (size 3-5)  - 3–5 endotracheal tubes (size 6-8,5),  - Stylet (intubation guide)  - Several nasogastric tubes/ suction catheters  - Difficult airway trolley (Difficult Airway Equipment):  - Standard airway supplies (as in anaesthesia trolley)  - Bougie  - Videolaryngoscope  - Cricothyrotomy set (needle or surgical kit)  - Manujet (jet ventilation system) |

| **Preparation of the Simulation Mannequin** |
| --- |
| - Positioned on the operating table  - Connected to the patient monitor  - Peripheral venous catheter (left forearm) with a 3-way stopcock and infusion system containing 1.5 g Cefuroxime in 100 ml NaCl 0.9%  - Anaesthesia trolley present in the room  - Videolaryngoscope and difficult airway trolley not in the simulation room (stored in the control room) |

| **Additional documents** |
| --- |
| - Pre-anaesthetic / anaesthetic chart  - ECG  - Laboratory results  - Informed consent form |

## Script for Scenario 2

**ATSA-Study**

Anaesthesiology Training Simulation-based Assessment - Study

Scenario script 2

|  | **Participants involved in the scenario:** | | | | |
| --- | --- | --- | --- | --- | --- |
| **Function** | Test subject:  anaesthesia trainee | Actor 1:  anaesthetic colleague | Actor 2: anaesthetic nurse | Actor 3:  scrub nurse | Actor 4:  consultant anaesthetist |
| **Number** | 1 | 1 | 1 | 1 | 1 |

|  | **Additional personnel:** | |
| --- | --- | --- |
| **Function** | Technician | Debriefer |
| **Number** | 1 | 1 |

**General information about the scenario**

| **Title**: Local anaesthetic toxicity with generalised seizure and cardiac arrest |
| --- |

| **Brief summary of the scenario** |
| --- |
| The scenario takes place around midday in an operating theatre within the surgical suite of a university hospital. The patient is a 61-year-old scheduled for open reduction and internal fixation (ORIF) of a complex humeral fracture. The responsible anaesthetist has performed both a brachial plexus block and general anaesthesia for this procedure.  The participant assumes care of the patient while covering his/her colleague’s lunch break. The patient is under general anaesthesia, intubated and receiving mechanical ventilation.  After approximately one minute, the patient begins to show signs of local anaesthetic toxicity. Initially, a generalized seizure occurs. A few minutes later, cardiac arrhythmias develop. After 5 minutes, the patient goes into cardiac arrest. The scenario concludes after administration of lipid emulsion, defibrillation and following **return of spontaneous circulation (ROSC).** |

| **ETR-defined competencies addressed in this scenario** | | |
| --- | --- | --- |
| **Domain** | **Competency (clinical skills and specific attitudes)** | **Level1** |
| Perioperative medicine, patient assessment and risk reduction | - Patient assessment based on history and physical examination, use of appropriate examinations and laboratory tests in patients of all age groups, with and without reduced functional cardiorespiratory capacity undergoing major and minor surgical routine and emergency interventions.  - Interpretation, considering the value and limitation of preoperative tests and monitoring  - Decision-making relating to postponement or cancellation of surgery | D  D |
| General anaesthesia and sedation | - Providing safe inhalation and intravenous induction, maintenance of, and emergence from general anaesthesia, including the choice of drugs, airway management, ventilation technique and intraoperative adverse event management  - Appropriate use of medical and technical equipment  - Trouble-shooting basic technical malfunctions of monitors and machines  - Regular use of recommended checklists and guidelines  - Maintenance of homeostasis of organ systems throughout different surgical procedures in patients with and without pre-existing diseases  - Diagnosis and management of intraoperative critical incidents including:  hypertension, hypotension, arrhythmias, [...], bradycardia, tachycardia, cardio-pulmonary resuscitation  intraoperative blood gas and electrolyte disturbances  seizure | D  D  D  D  D  D |
| Regional anaesthesia | - Diagnosis and management of intraoperative critical incidents including:  local anaesthetic toxicity | D |
| Postoperative care and acute pain management | - Use of discharge and transfer criteria to ICU | D |
| Intensive care medicine | - Performing patient assessment and physical examination [...]  - Disease assessment and disease management including:  Haemodynamic management and stabilization including advanced cardiovascular monitoring, inotropic and vasoactive therapy, basic and advanced life support, defibrillation, cardioversion, pacing [...]  Fluid substitution, volume management  Neurological management [...]  - Effectively communicate with other health care providers  - Team work together with other health care professionals to ensure smooth patient care and safety  - Vigilance and situational awareness | D  D  D  D  D  D |
| Critical emergency medicine | - Management of life-threatening medical and surgical emergency conditions  - Performing intra-hospital resuscitation [...] | D  D |
| Anaesthesia Non-Technical Skills (ANTS) | - Task management;  Planning and preparing  Prioritizing  Providing and maintaining standards  Identifying and utilizing resources  - Team working:  Coordinating activities with team members  Exchanging information  Using authority and assertiveness  Assessing capabilities  Supporting others  - Situation Awareness:  Gathering information  Recognizing and understanding  Anticipating  - Decision making:  Identifying options [...]  Balancing risks and selecting options  Re-evaluating | D  D  D  D  D  D  D  D  D  D  D  D  D  D  D |
| Patient safety and health economics | - Use of checklists and guidelines  - Commitment to critical incidents reporting | D  D |
| (1): Level of competencies: 'A: observer level (has knowledge of, describes)'; 'B: performs, manages, demonstrates under direct supervision'; 'C: performs, manages, demonstrates under distant supervision'; 'D: performs, manages, demonstrates independently | | |

**Information for the participant**

| **Case briefing for the participant** |
| --- |
| The scenario takes place around midday in an operating theatre within the surgical suite of a university hospital. The patient is a 71-year-old scheduled for open reduction and internal fixation (ORIF) of a complex humeral fracture on the right side. The responsible anaesthetist has administered both a brachial plexus block and general anaesthesia for the procedure.  -----------------------------------------------------------------------------------------------------------------------------  Details from the Anaesthesia Record:  The patient is a 71-year-old man, 170 cm tall and weighing 80 kg (BMI 28)  Planned operation: open reduction and internal fixation (ORIF) of a complex humeral fracture on the right side.  **Allergies:** None  **Smoking history:** 60 pack-years  **Alcohol consumption:** 1–2 glasses of wine per day; spirits occasionally  Past medical history: Type 2 diabetes mellitus on insulin, arterial hypertension, chronic kidney disease, stage IIIb, peripheral arterial occlusive disease, no known coronary artery disease; good biventricular function (EF > 50%).  Previous procedures: left knee arthroscopy; colonoscopy with polyp removal  Regular medication: aspirin 100mg once daily, pantoprazole 40mg once daily, carvedilol 12.5mg once daily, ramipril 10mg once daily, furosemide 40mg twice daily, Insulin glargine 6 IU at night, Metformin 850mg twice daily.  Airway assessment: No signs of a difficult airway. Mouth opening 4–5 cm. Mallampati class II. Jaw protrusion >0º; upper lip bite test grade I (skin of upper lip is bitten). Thyromental distance >6.5 cm. Cervical spine range of motion (flexion to extension) >100°. Neck circumference 42 cm. No dentures. No known obstructive sleep apnoea (OSA).  Lab results: creatinine 1.3mg dl-1, Haemoglobin b 11.2 g dl. Electrolytes, coagulation, and platelets: within normal limits  Preoperative ECG: no abnormalities  Anaesthesia consent form: signed  Premedication: none administered on the ward  ---------------------------------------------------------------------------------------------------------------------------------------  You are covering the anaesthetist’s lunch break. Your colleague is waiting for you to take over. |

**Information for instructors**

| **Detailed description of the scenario** |
| --- |
| The scenario takes place around midday in an operating theatre within the surgical department of a university hospital. The patient is a 71-year-old man scheduled for open reduction and internal fixation (ORIF) of a complex humeral fracture on the right side. The responsible anaesthetist has administered both a brachial plexus block and general anaesthesia for the procedure.  The patient is multimorbid, with type 2 diabetes mellitus requiring insulin therapy, arterial hypertension, stage IIIb chronic kidney disease, and peripheral arterial occlusive disease. There is no known coronary artery disease, and the patient has good biventricular function (LVEF >50%).  Laboratory results show a creatinine level of 1.3 mg dl-1 and haemoglobin of 11.2 g dl-1. Coagulation parameters and platelet count are within the normal range. The preoperative ECG is unremarkable.  **Shortly before the starting situation:**  The responsible anaesthetist performed a brachial plexus block (interscalene approach) under ultrasound guidance using 50 ml of 0.75% ropivacaine, without complications. This was followed by induction of general anaesthesia with sufentanil 30 µg, propofol 150 mg, and cisatracurium 10 mg. Mask ventilation was easy, and intubation was Cormack-Lehane grade II. An 8.0 mm endotracheal tube was inserted.  Ephedrine was administered intravenously. Mechanical ventilation was uneventful (FiO₂ 40%, pressure-controlled ventilation at 22 cmH₂O, PEEP 5 cmH₂O, tidal volume 500 ml, respiratory rate 13/min). Balanced anaesthesia was maintained with sevoflurane.  An arterial line was placed in the left radial artery, along with a second peripheral venous catheter (16G) on the same side.  (The participant is briefed outside the door).  **Initial Situation (as the participant enters):**  The handover takes place in the operating theatre. The patient is lying on the operating table, under general anaesthesia, intubated and receiving mechanical ventilation. He is stable from both a respiratory and circulatory perspective. Two i.v. infusions are running.  The anaesthetic nurse is tidying up the anaesthesia trolley, while the scrub nurse is preparing the surgical instruments. The surgical field has been cleaned and covered with sterile drapes. The orthopaedic/trauma surgery trainee had to attend an emergency on the ward. The consultant orthopaedic/trauma surgeon has not yet arrived. Both surgeons are being awaited.  **Progression of the Scenario (see table for vital parameters):**  Phase 1 (excitatory phase of neurological toxicity):  One minute after the consultant anaesthetist leaves, the patient develops a generalised tonic-clonic seizure under general anaesthesia. Visible signs include generalised shaking, hypertension, and sinus tachycardia. The shaking is simulated and verbalised by the scrub nurse.  The anaesthetic nurse asks whether the patient is sufficiently anaesthetised and whether hypnotics or antihypertensive agents should be administered. The convulsions, along with hypertension and tachycardia, will continue until minute 3 unless the patient is treated with benzodiazepines or other hypnotic agents.  Phase 2 (depressive phase of neurological toxicity):  At 3 minutes after the begin of the scenario, the previously observed seizure activity ceases. Heart rate and blood pressure return to normal levels.  Phase 3 (cardiovascular toxicity):  At 3 minutes after the begin of the scenario, the first signs of cardiovascular toxicity begin to appear: ventricular ectopic beats, increasing bradycardia from minute 3:30, marked hypotension from minute 4, and widening of the QRS complex from minute 4:30.  If the trainee does not recognise the haemodynamic deterioration or fails to take action, the anaesthetic nurse will verbalise it (e.g. “Why is the patient hypotensive?”). If no treatment is initiated for the circulatory instability, the anaesthetic nurse will actively ask whether they should administer any medication.  If the trainee has not yet called for help at this point, the anaesthetic nurse will suggest doing so.  The consultant will be reachable and will respond that they are on their way and will arrive as soon as possible.  Phase 4 (cardiac arrest):  After 5 minutes, the patient develops a cardiac arrest with pulseless electrical activity (PEA). If the trainee does not initiate resuscitation, the anaesthetic nurse will ask whether the patient has a pulse. If despite this, no action is undertaken, the anaesthetic nurse will start chest compressions. At this point, the scrub nurse will actively participate in the resuscitation.  At minute 7, the initial PEA rhythm progresses to ventricular fibrillation. If the trainee requests the defibrillator or lipid emulsion, they must be fetched from outside the operating theatre (by the scrub nurse). If the lipid emulsion is administered before minute 9, the second defibrillation (around minute 9) will be successful, and the next rhythm check will show return of spontaneous circulation (ROSC).  **End of the scenario:** The consultant anaesthetist arrives by minute 9 at the latest and initiates specific lipid therapy (if not already done). The scenario ends no later than minute 11, following ROSC. |

| **Limitations of the scenario** |
| --- |
| - The mannequin is unable to simulate convulsions. Shaking must be simulated and verbalised by the scrub nurse.  - The mannequin can be defibrillated; however, the defibrillator is a real medical device and may only be operated by individuals who have received appropriate training. Both the actors and the participant must be briefed accordingly. |

| **Setting and controlling vital signs** | | | | | |
| --- | --- | --- | --- | --- | --- |
| **Time** | **Comments** | **SpO2 (%)** | **EtCO2 (kPa)** | **HR (beats/min)** | **IABP (mmHg)** |
| At handover | Stable | 100 | 4.9 | 63 | 120/65 |
| 1 min | Seizure under general anaesthesia | “ | 5.6 | 110 | 180/100 |
| 1 min 30 s | Seizure under general anaesthesia | 100 | 5.7 | 140 | 190/110 |
| 2 min | Seizure under general anaesthesia | 100 | 5.8 | 135 | 180/100 |
| 2 min 30 s | Seizure under general anaesthesia | 100 | 6.0 | 130 | 180/100 |
| 3 min | End of the seizure  🡪 CNS depression | 100 | 5.6 | 110 + VES | 145/90 |
| 3 min 30 s | Progressive cardiovascular toxicity:  normal heart rate + VES | 98 | 5.3 | 80 + VES | 110/50 |
| 4 min | Bradycardia + VES + hypotension | 94 | 4.0 | 50 + VES | 70/40 |
| 4 min 30 s | Bradycardia + QRS prolongation + hypotension | 90 | 3.3 | 30 + wide QRS complex | 60/35 |
| 5 min | Cardiac arrest / Pulseless electrical activity (PEA) | no adequate waveform | (1.3under CPR) | 25 | no adequate waveform |
| 5 min 30 s | ’’ | '' | '' | 25 (no signal under CPR) | - |
| 6 min | ’’ | '' | '' | 25 (no signal under CPR) | - |
| 6 min 30 s | ’’ | '' | '' | 25 (no signal under CPR) | - |
| 7 min | Cardiac arrest / Ventricular fibrillation (VF) | '' | '' | VF | - |
| 7 min 30 s | ’’ | '' | '' | VF | - |
| 8 min | ’’ | '' | '' | VF | - |
| 8 min 30 s | ’’ | '' | '' | VF | - |
| 9 min | ’’ | '' | '' | VF | - |
| 9 min 30 s | ’’ | '' | '' | VF | - |
| 10 min | ’’ | '' | '' | VF | - |
| *Before CPR* | If ephedrine administered | *-* | *-* | *-* | *↑10%* |
| *Before CPR* | If noradrenaline administered | *-* | *-* | *-* | *↑↑20%* |
| *Before CPR* | If noradrenaline administered | *-* | *-* | *↑↑↑ 30-50%* | *↑↑↑ 30-50%* |
| *Anytime* | If lipid emulsion is administered: ROSC at the next rhythm check | *100%* | *2.7* | *110* | *95/40* |

| **Specific instructions for actor 1: anaesthetic colleague** |
| --- |
| The scenario takes place around midday in an operating theatre within the surgical department of a university hospital.  The patient is a 71-year-old scheduled for open reduction and internal fixation (ORIF) of a complex humeral fracture on the right side.  You are an anaesthetist and are very familiar with the hospital and your working environment.  **Handover Information:**  You performed a brachial plexus block (interscalene approach) under ultrasound guidance using 50 ml of 0.75% ropivacaine. Visualisation of the anatomical structures with ultrasound was challenging and took some time, but the block was ultimately completed without complications.  Following this, you induced general anaesthesia with sufentanil 30 µg, propofol 150 mg, and cisatracurium 10 mg. Facial mask ventilation was easy, and laryngoscopy view was as Cormack-Lehane grade II. Intubation with an 8.0 mm endotracheal tube was easy.  You administered some ephedrine for mild hypotension after induction. Mechanical ventilation has been uneventful (FiO₂ 40%, PCV 22 cmH₂O, PEEP 5 cmH₂O, tidal volume 500 ml, respiratory rate 13/min). Balanced anaesthesia is being maintained with sevoflurane. You placed an arterial line in the left radial artery, along with a second 16G peripheral venous catheter.  After induction, you and the anaesthetic nurse transferred the patient into the operating theatre. |

| **Specific instructions for actor 2: anaesthetic nurse** |
| --- |
| The scenario takes place around midday in an operating theatre within the surgical department of a university hospital.  The patient is 71 years old and is scheduled for open reduction and internal fixation (ORIF) of a complex humeral fracture on the right side.  You are an experienced anaesthetic nurse and are very familiar with the hospital and your working environment.  You transferred the patient from the holding area to the anaesthetic room and connected them to the monitor. You assisted the responsible anaesthetist (a specialist) with a brachial plexus block. It appeared somewhat challenging, as it took some time to complete.  Following this, you both initiated an uneventful general anaesthetic and transported the patient into the operating theatre.  In theatre, the patient has already been prepped and draped. The orthopaedic/trauma surgery trainee assisted with this but had to leave urgently to attend a ward emergency. The orthopaedic/trauma consultant has not yet arrived. The scrub nurse is at the table, and the team is now waiting for the surgeons.  *(At this point, the new anaesthetist —played by the participant— enters. The handover from the specialist anaesthetist to the participant takes place. The scenario begins immediately after the handover.)*  **Minute 1 – simulated seizure:**  After 1 minute, the patient exhibits a seizure (simulated by the scrub nurse). You are standing next to the anaesthesia workstation. You ask the trainee whether the patient is adequately anaesthetised.  If the seizure—accompanied by tachycardia and hypertension—is not treated within one minute (i.e. by minute 2), you actively ask whether benzodiazepines or other hypnotic agents should be administered. For the severe hypertension, you should ask whether antihypertensive medication should be administered.  If left untreated, the seizure will continue until minute 3 (total duration: 2 minutes). If the trainee examines the patient’s pupils, you should state that they are **dilated, equal in size, slowly reactive to light**, and that there is **upward gaze (forced deviation upwards).**  Minute 3 – cardiovascular toxicity:  From minute 3, signs of cardiovascular toxicity begin to appear. If the trainee does not respond to the haemodynamic deterioration, you should verbalise your concern (e.g. **“The patient is becoming more and more hypotensive”**). If the circulatory instability is not addressed, you must actively ask which medications should be given (e.g. **“Shall I give some noradrenaline?”,** **“Would you like me to prepare a noradrenaline infusion?”).**  If the trainee has not yet called for help at this point, you may suggest doing so.  Minute 5 – cardiac arrest (PEA):  From minute 5, the patient goes into cardiac arrest (pulseless electrical activity – PEA). If the trainee does not initiate resuscitation, you should actively ask: **“Does the patient have a pulse?”**  If resuscitation is still not started, you should begin chest compressions yourself. If the trainee not yet called the consultant, you should also prompt them (e.g. **“Please call your consultant").**  If the participant requests the defibrillator or lipid emulsion, the scrub nurse should leave the theatre to fetch them. From this point onwards, the scrub nurse will actively participate in the resuscitation efforts.  Minute 7 – cardiac arrest (ventricular fibrillation):  From minute 7, the rhythm changes to **ventricular fibrillation.**  If the trainee has not yet requested the defibrillator, you should suggest doing so.  The mannequin **can be defibrillated**. Two metal plates are attached to the chest of the manikin for this purpose.  **Important:** The defibrillator is a real medical device and must only be operated by individuals who have received proper training. The trainee is expected to perform the defibrillation (they will have been briefed accordingly).  The consultant anaesthetist will enter the scenario no later than minute 9, to take the lead of the CPR and initiate specific therapy, if not previously done. The scenario ends following the return of spontaneous circulation. |

| **Specific instructions for actor 3: scrub nurse** |
| --- |
| The scenario takes place around midday in an operating theatre within the surgical department of a university hospital.  The patient is a 71-year-old man scheduled for open reduction and internal fixation (ORIF) of a complex humeral fracture on the right side.  You are an experienced scrub nurse who occasionally works as an anaesthetic assistant. You are very familiar with the hospital and your working environment.  After induction of anaesthesia, the anaesthesia team brought the patient into the theatre. In theatre, the patient has been prepped and draped in a sterile fashion. The orthopaedic/trauma surgeon trainee was present during skin prep and draping and assisted, but had to leave urgently to attend a ward emergency. The orthopaedic/trauma consultant has not yet arrived.  You have completed your surgical setup and are now scrubbed in and standing at the sterile table. Everyone is waiting for the surgical team to begin.  *(As the trainee enters, the anaesthetic handover takes place. The scenario begins immediately).*  **Minute 1 – simulated seizure:**  After 1 minute, the patient begins to seize. As the manikin cannot simulate a seizure, you must physically simulate it by grasping the mannequins right arm and thorax and gently shaking them for a total of **2 minutes** (until minute 3), or until the participant administers a benzodiazepine or hypnotic. At the same time, you repeatedly shout in a distressed manner: **“The patient is shaking! He is awake!”**  Minute 3 – cardiovascular toxicity:  From minute 3, the patient begins to deteriorate. You remain sterile at the table. If you are asked to assist, respond with: **“Do I need to break sterility for this? Are you sure it’s necessary?”**  Minute 5 – cardiac arrest (PEA):  From minute 5, the patient progresses to **pulseless electrical activity.** Either the anaesthetic nurse or the participant will begin chest compressions. At this point, you actively offer help and ask: **“Can I help? What do you want me to do?”.** From this moment on, you will be **actively involved in the resuscitation.**  If the participant requests the **defibrillator** or **lipid emulsion**, you leave the theatre to retrieve them. (Both are located in the control room).  Minute 7 – cardiac arrest (ventricular fibrillation):  After 7 minutes, the rhythm changes to **ventricular fibrillation.** The mannequin can be defibrillated. Two metallic pads are attached to the manikin’s chest for this purpose.  If it has not yet been requested, you should ask "Should I bring the defibrillator?" (located in the control room).  **Important:** The defibrillator is a real medical device and must only be used by individuals who have received proper training. The **trainee** is expected to carry out the defibrillation (they will have been briefed and trained accordingly).  The scenario is resolved by the consultant anaesthetist no later than **minute 9**, who steps in to manage the situation. The scenario ends after **ROSC.** |

| **Specific instructions for actor 4: consultant anaesthetist** |
| --- |
| The scenario takes place around midday in an operating theatre within the surgical suite of a university hospital. The patient is a 71-year-old man scheduled for open reduction and internal fixation (ORIF) of a complex humeral fracture on the right side.  You are the designated consultant anaesthetist for the area, responsible for four theatres. You have asked the trainee to relieve the primary anaesthetist (anaesthetist colleague) for the lunch break.  The responsible anaesthetist previously performed an interscalene brachial plexus block using 50 ml of 0.75% ropivacaine, followed by a standard general anaesthetic.  After handover, the patient will develop signs of **local anaesthetic systemic toxicity (LAST).** Initially with **a generalised seizure under general anaesthesia**. Followed by **progressive cardiovascular instability from minute 3.** Leading to **cardiac arrest** from minute 5 onwards  **If you are contacted during the hypotensive phase (before cardiac arrest): y**ou respond by saying: “I’ll be there as soon as I can”. You do **not** enter the theatre at this point.  **If you are called after cardiac arrest has begun,** you enter the scenario **at minute 9** and take control of the situation.  In the scenario, you ask about the sequence of events, make the diagnosis of **local anaesthetic toxicity**, and confirm the indication for **specific treatment with intravenous lipid emulsion** (if it has not already been administered).  The scenario ends no later than **minute 11**, following **return of spontaneous circulation (ROSC).** |

**Organisational aspects / preparation**

| **Required Equipment** |
| --- |
| - Simulation mannequin  - Standard anaesthesia monitor  - Standard anaesthesia machine  - Anaesthesia trolley  - Self-inflating bag with reservoir  - Suction unit connected to a vacuum source  - Emergency trolley with defibrillator  - Operating table  - Boxes with simulated surgical tools  - Surgical side table (instrument table)  - Video-/audio recording system |

| **Consumables** |
| --- |
| - Surgical cap and face mask  - Patient gown  - Blanket  - Peripheral venous catheter (PVC) + 3-way stopcock  - Suction catheters + collection bag (for drainage of infusions/medications)  - Sodium chloride 0.9% (100 ml)  - Standard crystalloid 500 ml × 2  - Multiple Green surgical drapes  - Boxes containing standard surgical materials  - Color-coded syringes for anaesthesia medications:  Hypnotics: Propofol, Midazolam, Etomidate, Thiopental, Ketamine. Opioids: Sufentanil / Fentanyl / Remifentanil / Piritramide. Muscle relaxants: Rocuronium, Cisatracurium, Atracurium, Mivacurium. Vasoactive drugs: Norepinephrine/ Epinephrine. Antiarrhythmics: Lidocaine, Amiodarone, Metoprolol. Antihypertensives: Urapidil, Labetalol, Nitroglycerin. Antiemetics: Granisetron, Dimenhydrinate, Dexamethasone, Droperidol.  - Airway equipment (Anaesthesia trolley):  - 3 face masks  - 3nasopharyngeal/oropharyngeal airways (Wendl / Guedel)  - 3 laryngeal masks (size 3-5)  - 3–5 endotracheal tubes (size 6-8,5),  - Stylet (intubation guide)  - Several nasogastric tubes/ suction catheters  - Emergency trolley with defibrillator  - Lipid emulsion 20% |

| **Preparation of the Simulation Mannequin** |
| --- |
| - Positioned on the operating table  - Connected to the patient monitor  - Peripheral venous catheter (left forearm) with a 3-way stopcock and infusion system  - Arterial line (in left radial artery position) connected to pressure infuser for arterial systems  - Anaesthesia trolley present in the room  - Emergency trolley with defibrillator not in the simulation room (stored in the control room)  - Mannequin prepped and draped in a sterile fashion |

| **Additional documents** |
| --- |
| - Pre-anaesthetic / anaesthetic chart  - ECG  - Laboratory results  - Informed consent form |
