# Supplementary material
Source: Research Square preprint supplement (doi:10.21203/rs.3.rs-9581391/v1)
Supplement: Supplementary file 6 [file afea0a3f3e7de320792fd76d.docx]

**ADDITIONAL FILE 5**

**Structured Assessment of Clinical Skills in Simulation (SACSS)**

Gerard S. Angeles-Fite1,2,3,4,*, Sara García-Ballester5, Federico Migliorelli6,7, Lidia Gómez-López4,8, Beatriz Tena2,4,8, Marina Vendrell2,4,8, Manuel López‐Baamonde4,7,8, Juan M. Perdomo2,4,8, Cristina Ibañez4,8, Raquel Bergé4,8, Tomás Cuñat4,8, Johannes Schäfer1,3, Albert Carramiñana4,8, Miriam F. Panzeri4,8, Ricard Valero2,7,8,9,† and Christopher Neuhaus1,3,†

1Medical Faculty Heidelberg, Department of Anesthesiology, Heidelberg University, Heidelberg, Germany.

2Departament de Cirurgia i Especialitats Medicoquirúrgiques, Facultat de Medicina i Ciències de la Salut, Universitat de Barcelona (UB), Barcelona, Spain.

3Heidelberg Anaesthesia and Emergency Simulation Centre (HANS), Heidelberg University Hospital, Heidelberg, Germany.

4Anaesthesiology Clinical Simulation Group (SIMCLÍNIC), *Hospital Clínic de Barcelona*, Barcelona, Spain.

5Department of Anaesthesiology and Critical Care, Bellvitge University Hospital, University of Barcelona, Hospitalet de Llobregat, Barcelona, Spain.

6BCNatal - Barcelona Center for Maternal-Fetal and Neonatal Medicine (*Hospital Clínic* *and Hospital Sant Joan de Déu*), *Institut Clínic de Ginecologia, Obstetrícia i Neonatologia*, Fetal i+D Fetal Medicine Research Center, Barcelona, Spain.

7Institut d’Investigacions Biomèdiques August Pi i Sunyer (IDIBAPS), Barcelona, Spain.

8Department of Anaesthesiology and Critical Care, *Hospital Clínic de Barcelona*, Barcelona, Spain.

9*Centro de Investigación Biomédica en Red de Salud Mental* (CIBERSAM), *Instituto de Salud Carlos III* (ISCIII), Spain

*Correspondence to: Gerard Sergi Angeles Fite, Department of Anaesthesiology and Intensive Care, Bürgerspital Solothurn, Schöngrünstrasse 42, 4500 Solothurn, Switzerland; Tel: +41326274041; E-mail: gerardsergi.angeles@gmail.com

†Contributed equally to this work

**Table of contents**

[SACSS for Scenario 1 3](#_Toc227448900)

[Task specific checklist 3](#_Toc227448901)

[Detailed global 5-point rating scale 5](#_Toc227448902)

[SACSS for Scenario 2 7](#_Toc227448903)

[Task specific checklist 7](#_Toc227448904)

[Detailed global 5-point rating scale 9](#_Toc227448905)

## SACSS for Scenario 1

**STRUCTURED ASSESSMENT OF CLINICAL SKILLS IN SIMULATION**

**SCENARIO 1: ALLERGIC ANGIOEDEMA WITH UNEXPECTED DIFFICULT AIRWAY**

### Task specific checklist

|  | Not done / Incorrect = 0 pts | Done correctly  = 1 pt |
| --- | --- | --- |
| Safety checks before induction: |  |  |
| - Patient identity verified |  |  |
| - Procedure confirmed |  |  |
| - Airway difficulty /aspiration risk assessed |  |  |
| - Known allergies checked |  |  |
| - Anaesthesia equipment checked |  |  |
| - Anaesthesia medications checked |  |  |
| - Patient’s anaesthetic risk assessed |  |  |
| - i.v. line patency checked |  |  |
| - Antibiotic infusion stopped |  |  |
| At induction: |  |  |
| - Verbalises SpO2 status |  |  |
| - Confirms loss of consciousness |  |  |
| - Controls time since muscle relaxant administration |  |  |
| Management of difficult manual ventilation: |  |  |
| - Optimises reclination/head position/jaw thrust |  |  |
| - Uses Guedel airway |  |  |
| - Requests help for two-person bag-valve-mask ventilation |  |  |
| - Administers supplemental hypnotic |  |  |
| - Administers supplemental muscle relaxant |  |  |
| Management of failed intubation: |  |  |
| - Verbalises problem (Cormack-Lehane III-IV), declares “can’t intubate” situation |  |  |
| - Calls second staff anaesthesiologist for help |  |  |
| - Performs bag-valve-mask ventilation after laryngoscopy /between attempts |  |  |
| - Considers/uses "Backward Upward Rightward Pressure (BURP)"/ "Optimum External Laryngeal Manipulation (OELM)" |  |  |
| - Considers/uses alternative intubation tools (different laryngoscope blade / different laryngoscope (McCoy) / intubation stylet) |  |  |
| - Total direct laryngoscopy attempts? (1–2 attempts = 1 pt; 0 or >2 attempts = 0 pts) |  |  |
| - Requests videolaryngoscope |  |  |
| - Uses videolaryngoscope |  |  |
| - Total videolaryngoscopy attempts? (1–2 attempts = 1 pt; 0 or >2 attempts = 0 pts) |  |  |
| - Requests fibrobronchoscope / difficult airway trolley |  |  |
| - Uses fibrobronchoscope |  |  |
| - Places laryngeal mask airway |  |  |
| - Rejects the option to wake up the patient |  |  |
| Management of “cannot intubate, cannot oxygenate”: |  |  |
| - Declares “cannot intubate, cannot oxygenate” situation |  |  |
| - Identifies need for emergent surgical airway (coniotomy/tracheostomy) |  |  |
| - Performs coniotomy |  |  |
| - Places laryngeal mask airway (1 pt if previously done) |  |  |
| - Attempts ventilation during surgical airway management |  |  |
| - Calls surgeon (general/ENT) for help in surgical airway management |  |  |
| Management of anaphylaxis / allergic angioedema: |  |  |
| - Verbalises suspected diagnosis of anaphylaxis / angioedema |  |  |
| - Administers adrenaline 0.5mg i.m. (or repeatedly 20-50ug i.v.) |  |  |
| - Administers H1-receptor antagonist i.v. |  |  |
| - Administers glucocorticoid i.v. |  |  |
| - Considers repeating adrenaline administration (0.5mg i.m. or 20-50ug i.v.) |  |  |
| Planning of extubation / postoperative care |  |  |
| - Assesses need to cancel/postpone surgery |  |  |
| - Plans ICU admission |  |  |
| Recording/ reporting unexpected difficult airway |  |  |
| - Reports/records unexpected difficult airway |  |  |
| Anaphylaxis tests: |  |  |
| - Considers serum tryptase/IgE testing |  |  |

### Detailed global 5-point rating scale

| Systematic assessment approach | 1  incomplete assessment | 2 | 3  adequate assessment minor flaws | 4 | 5  complete and structured assessment |
| --- | --- | --- | --- | --- | --- |
| Physical examination | 1  too brief or irrelevant | 2 | 3  attention to most important warning signs | 4 | 5  highly accurate and situation-appropriate |
| Vital signs and monitoring | 1  possibly unaware of critical situation | 2 | 3  attention to most important warning signs | 4 | 5  very adequate and anticipatory |
| Knowledge of equipment | 1  unfamiliar with tools; frequent confusion | 2 | 3  knows names of most instruments/ equipment used | 4 | 5  clearly familiar with all equipment / tool names |
| Handling of equipment | 1  frequent errors or inefficiencies | 2 | 3  appropriate use of the equipment | 4 | 5  advanced use of the equipment |
| Use of assistants | 1  fails to use assistants, ineffective delegation | 2 | 3  good use of assistants most of the time | 4 | 5  strategic and optimal use of team |
| Time and motion | 1  many unnecessary moves, disorganized, inefficient | 2 | 3  quite efficient time/motion but unnecessary moves | 4 | 5  smooth, economy of movement and maximum efficiency |
| Therapy and medication | 1  inappropriate or harmful choices | 2 | 3  adequate therapy, no harm | 4 | 5  very accurate, timely, and evidence based |
| Guideline-based management | 1  deficient knowledge, seems lost, waits for suggestions from rest of the team | 2 | 3  knows most important steps and aspects of the management | 4 | 5  Comprehensive and confident application |
| Overall performance | 1  poor clinical performance | 2 | 3  average | 4 | 5  excellent, high-level clinical performance |

## SACSS for Scenario 2

**STRUCTURED ASSESSMENT OF CLINICAL SKILLS IN SIMULATION**

**SCENARIO 2: LOCAL ANAESTHETICS SYSTEMIC TOXICITY WITH SEIZURES AND CARDIAC ARREST**

### Task specific checklist

|  | Not done / Incorrect = 0 pts | Done correctly  = 1 pt |
| --- | --- | --- |
| Management of seizure: |  |  |
| - Recognises tachycardia |  |  |
| - Recognises hypertension |  |  |
| - Diagnosis seizure under general anaesthesia |  |  |
| - Administers sedative-hypnotic medication |  |  |
| - Calls staff anaesthesiologist for help |  |  |
| - Examines the pupils |  |  |
| - Performs arterial blood gas (ABG) analysis |  |  |
| Management of bradycardia: |  |  |
| - Recognises bradycardia |  |  |
| - Administers atropine i.v. |  |  |
| - Considers external pacing |  |  |
| - Requests defibrillator |  |  |
| Management of hypotension: |  |  |
| - Recognises hypotension |  |  |
| - Administers i.v. vasopressor bolus |  |  |
| - Administers i.v. fluid bolus |  |  |
| Management of cardiac arrest: |  |  |
| - Recognises and verbalises cardiac arrest with pulseless electrical activity |  |  |
| - Calls staff anaesthesiologist for help |  |  |
| - Requests defibrillator (1 pt if previously done) |  |  |
| - Starts (or delegates initiation of) chest compressions |  |  |
| - Provides continuous chest compressions (secured airway) |  |  |
| - Assesses and gives feedback on quality of chest compressions |  |  |
| - Administers (or verbalises) O2 with FiO2 1.0 |  |  |
| - Reviews (or verbalises) the EtCO2 tracing |  |  |
| - Provides effective ventilation: switches to manual ventilation / verbalises adjusting to volume controlled ventilation and increasing Pmax |  |  |
| - Administers adrenaline 1mg i.v. at the start of resuscitation (<1min) |  |  |
| - Performs a rhythm check after 2 min of chest compressions |  |  |
| - Recognises ventricular fibrillation |  |  |
| - Performs a defibrillation (shock) |  |  |
| - Administers second dose of adrenaline after 3-5min |  |  |
| - Minimises interruption of chest compressions |  |  |
| - Makes a differential diagnosis of reversible causes of cardiac arrest |  |  |
| - Performs an arterial blood gas (ABG) to identify reversible causes (1 pt. if previously done) |  |  |
| - Considers ultrasound imaging to identify reversible causes |  |  |
| - Considers administration of amiodarone (after third shock) |  |  |
| - Considers need for eCPR /ECLS (V–A ECMO) |  |  |
| Management after ROSC |  |  |
| - Applies ABCDE Approach |  |  |
| - Aims for SpO2 94–98% and normal PaCO2 |  |  |
| - Administers vasopressors after ROSC |  |  |
| - Seeks to perform a 12-lead ECG |  |  |
| - Aims for targeted temperature management |  |  |
| Management of local anaesthetics systemic toxicity: |  |  |
| - States suspected diagnosis of local anaesthetics systemic toxicity |  |  |
| - Asks nurse to bring lipid emulsion |  |  |
| - Administers initial bolus of lipid emulsion in adequate dose (1.5ml/kg in 1 minute) |  |  |
| - Initiates infusion of lipid emulsion |  |  |
| Prioritisation / Planning of postoperative care |  |  |
| - Verbalises need to cancel surgery |  |  |
| - Plans ICU admission |  |  |

### Detailed global 5-point rating scale

| Systematic assessment approach | 1  incomplete assessment | 2 | 3  adequate assessment minor flaws | 4 | 5  complete and structured assessment |
| --- | --- | --- | --- | --- | --- |
| Physical examination | 1  too brief or irrelevant | 2 | 3  attention to most important warning signs | 4 | 5  highly accurate and situation-appropriate |
| Vital signs and monitoring | 1  possibly unaware of critical situation | 2 | 3  attention to most important warning signs | 4 | 5  very adequate and anticipatory |
| Knowledge of equipment | 1  unfamiliar with tools; frequent confusion | 2 | 3  knows names of most instruments/ equipment used | 4 | 5  clearly familiar with all equipment / tool names |
| Handling of equipment | 1  frequent errors or inefficiencies | 2 | 3  appropriate use of the equipment | 4 | 5  advanced use of the equipment |
| Use of assistants | 1  fails to use assistants, ineffective delegation | 2 | 3  good use of assistants most of the time | 4 | 5  strategic and optimal use of team |
| Time and motion | 1  many unnecessary moves, disorganized, inefficient | 2 | 3  quite efficient time/motion but unnecessary moves | 4 | 5  smooth, economy of movement and maximum efficiency |
| Therapy and medication | 1  inappropriate or harmful choices | 2 | 3  adequate therapy, no harm | 4 | 5  very accurate, timely, and evidence based |
| Guideline-based management | 1  deficient knowledge, seems lost, waits for suggestions from rest of the team | 2 | 3  knows most important steps and aspects of the management | 4 | 5  Comprehensive and confident application |
| Overall performance | 1  poor clinical performance | 2 | 3  average | 4 | 5  excellent, high-level clinical performance |
